# Supplementary material
Source: PubMed Central journal article supplement (PMC2888837)

# Supporting Information

## **Rapid Assembly of Oligosaccharides: a Highly Convergent Strategy for the Assembly of a Glycosylated Amino Acid Derived from PSGL-1**

Yusuf Vohra, Therese Buskas, Geert-Jan Boons\*

Complex Carbohydrate Research Center, University of Georgia, 315 Riverbend Road, Athens, GA 30602

\*Corresponding author

[gjboons@ccrc.uga.edu](mailto:gjboons@ccrc.uga.edu)

| <b>Table of Contents:</b>         | <b>Page</b> |
|-----------------------------------|-------------|
| General methods                   | 2           |
| NMR spectra of compound <b>8</b>  | 3           |
| NMR spectra of compound <b>9</b>  | 5           |
| NMR spectra of compound <b>10</b> | 7           |
| NMR spectra of compound <b>11</b> | 9           |
| NMR spectra of compound <b>13</b> | 11          |
| NMR spectra of compound <b>14</b> | 13          |
| NMR spectra of compound <b>7</b>  | 15          |
| NMR spectra of compound <b>15</b> | 17          |
| NMR spectra of compound <b>16</b> | 19          |
| NMR spectra of compound <b>1</b>  | 21          |

**General methods:** All reactions were carried out under nitrogen with anhydrous solvents, unless otherwise stated.  $\text{CH}_2\text{Cl}_2$  was distilled from  $\text{CaH}_2$  prior to use in reactions. All the starting materials were kept *in vacuo* with  $\text{P}_2\text{O}_5$  prior to use. Chemicals used were reagent grade as supplied except where noted. *N*-iodosuccinimide was used after recrystallization in dioxane/ $\text{CCl}_4$ . Column chromatography was performed on silica gel G60 (60-200  $\mu\text{m}$  60 Å), reactions were monitored by TLC on Silicagel 60 F<sub>254</sub>. The compounds were detected by examination under the UV light and visualized by charring with 10% sulfuric acid in MeOH or cerium ammonium molybdate in 20% aq. sulfuric acid. Solvents were removed under reduced pressure at  $\leq 30$  °C.  $^1\text{H-NMR}$  and HSQC spectra were recorded in  $\text{CDCl}_3$  at 500 MHz on a Varian Inova spectrometer with tetramethylsilane as internal standard, unless otherwise stated. High-resolution mass spectra were obtained by using MALDI-ToF with 2,5-dihydroxybenzoic acid as matrix and the internal standards ultramark 1621 and PEG.

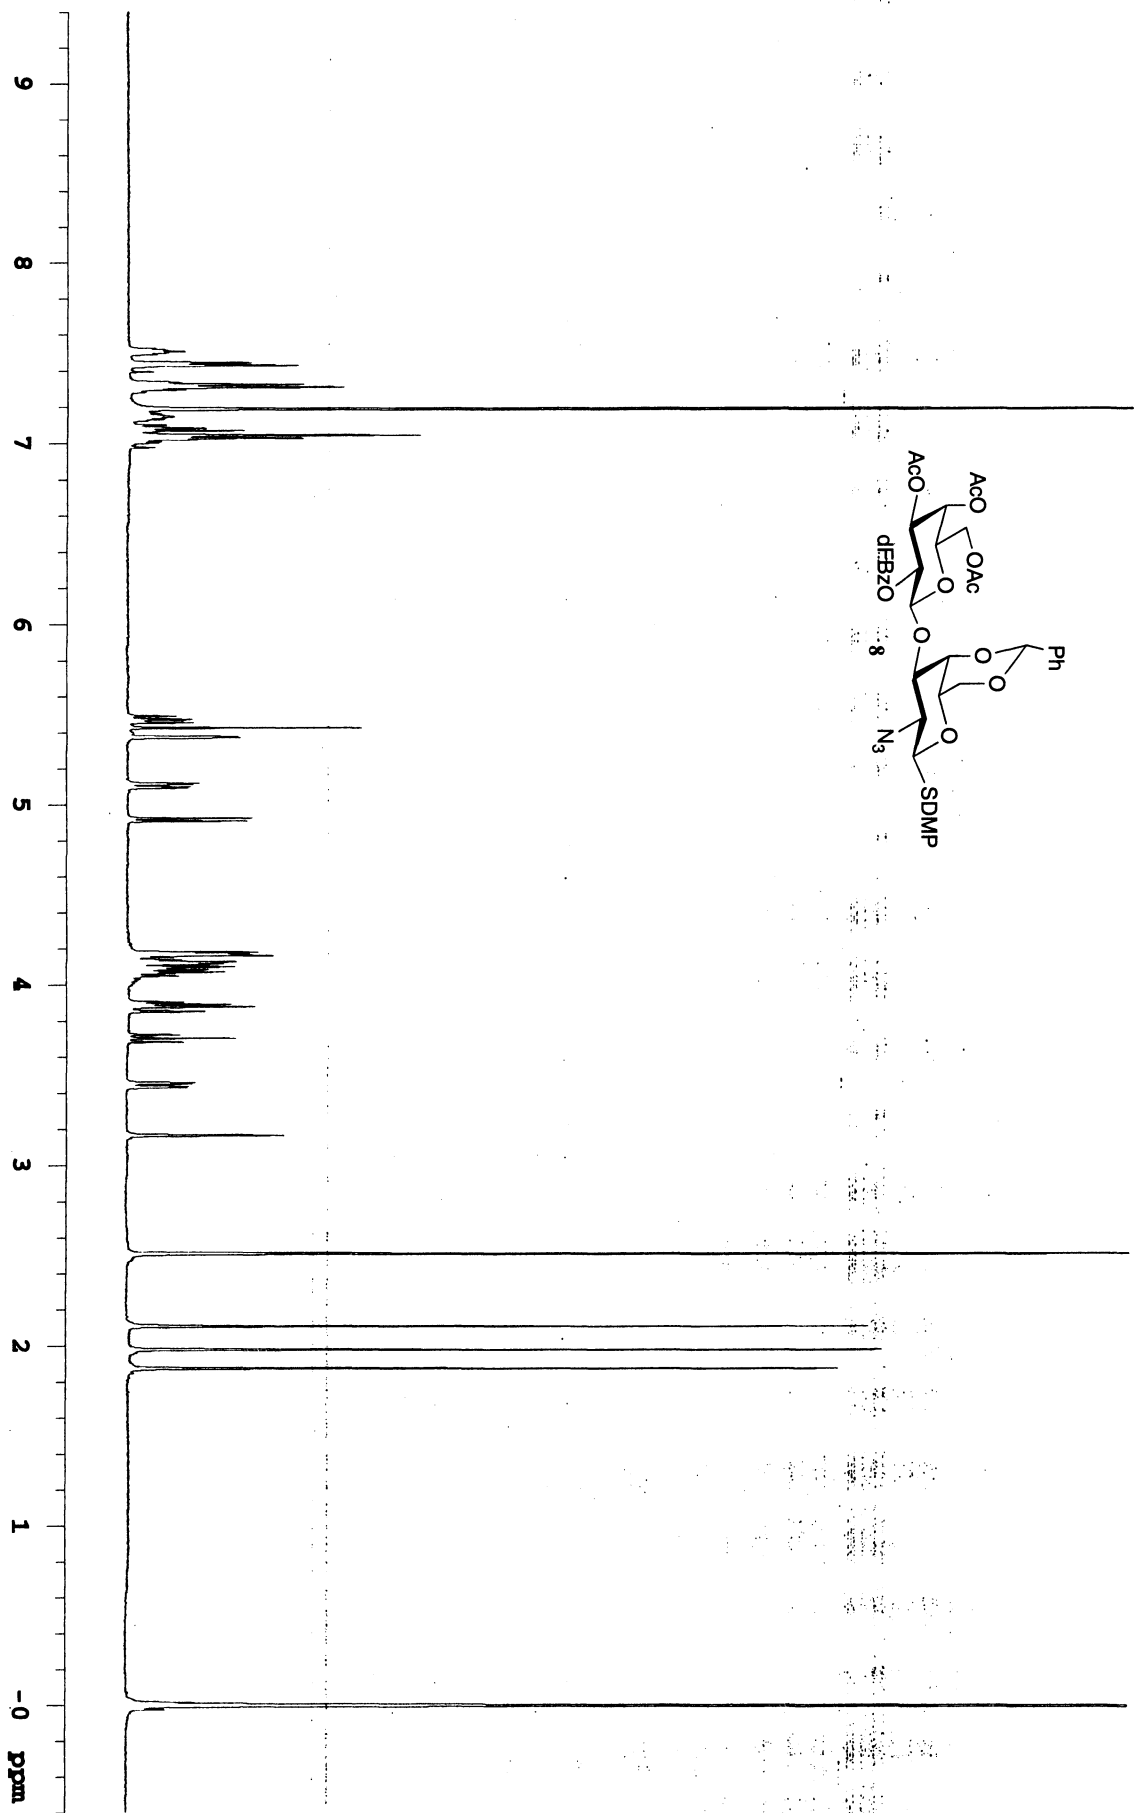

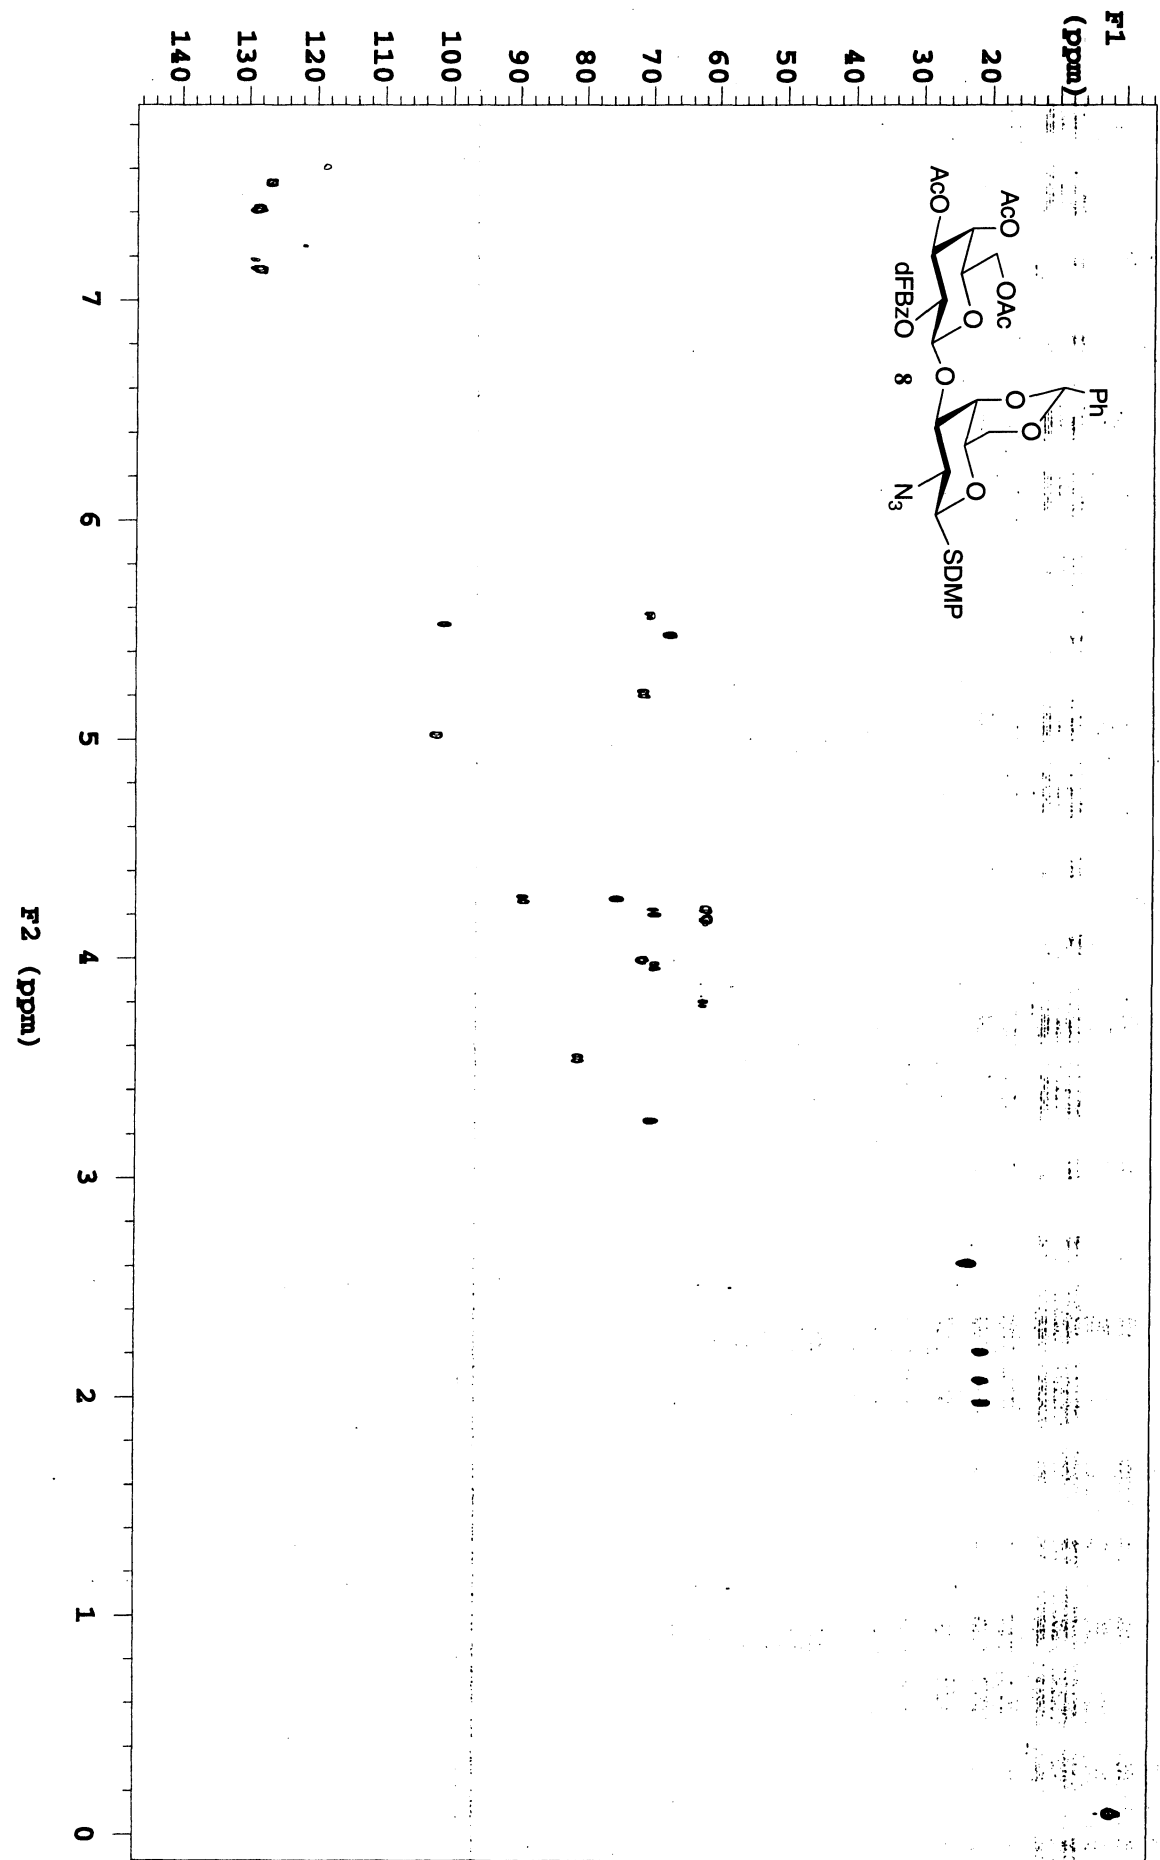

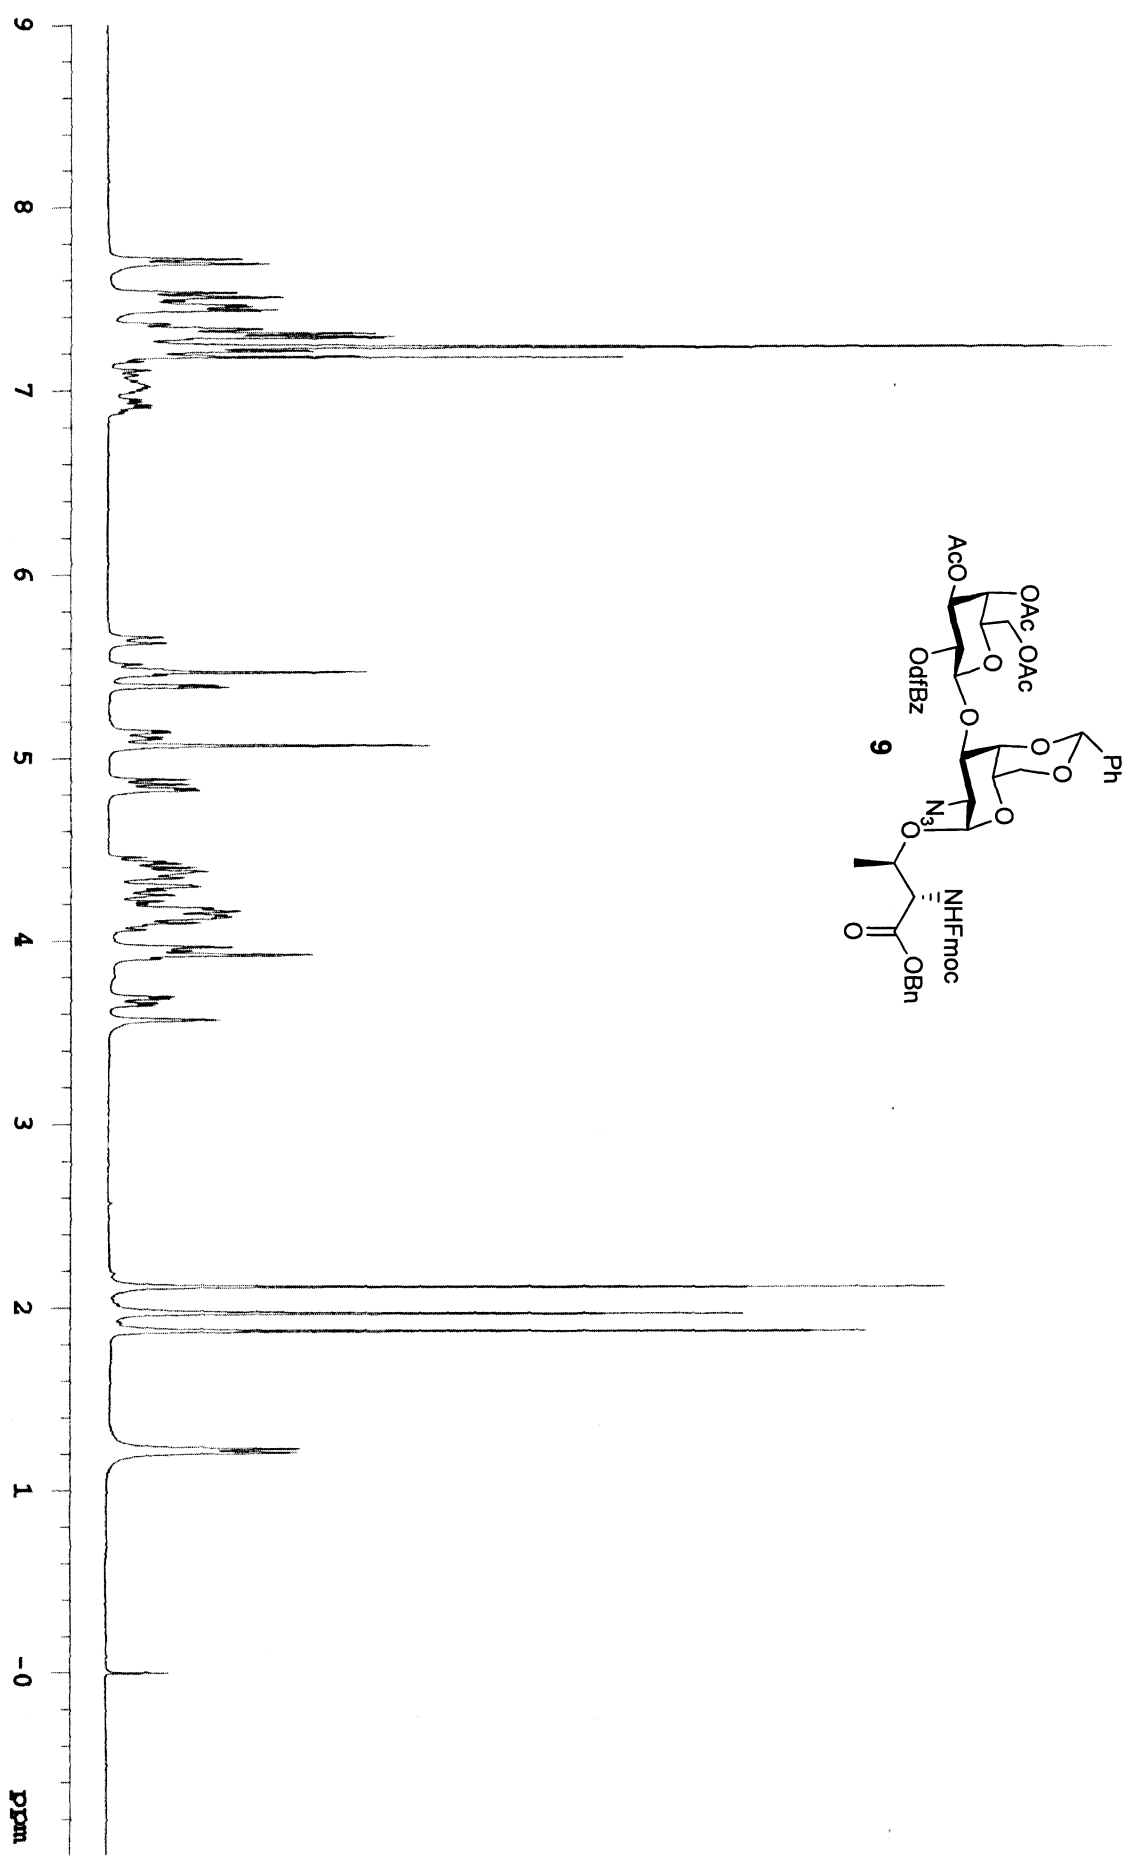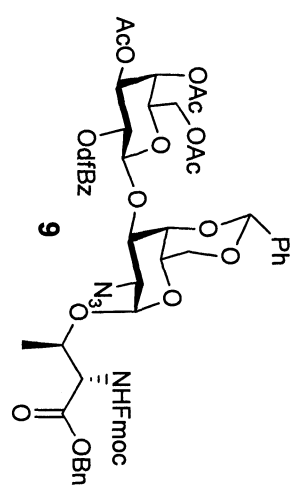

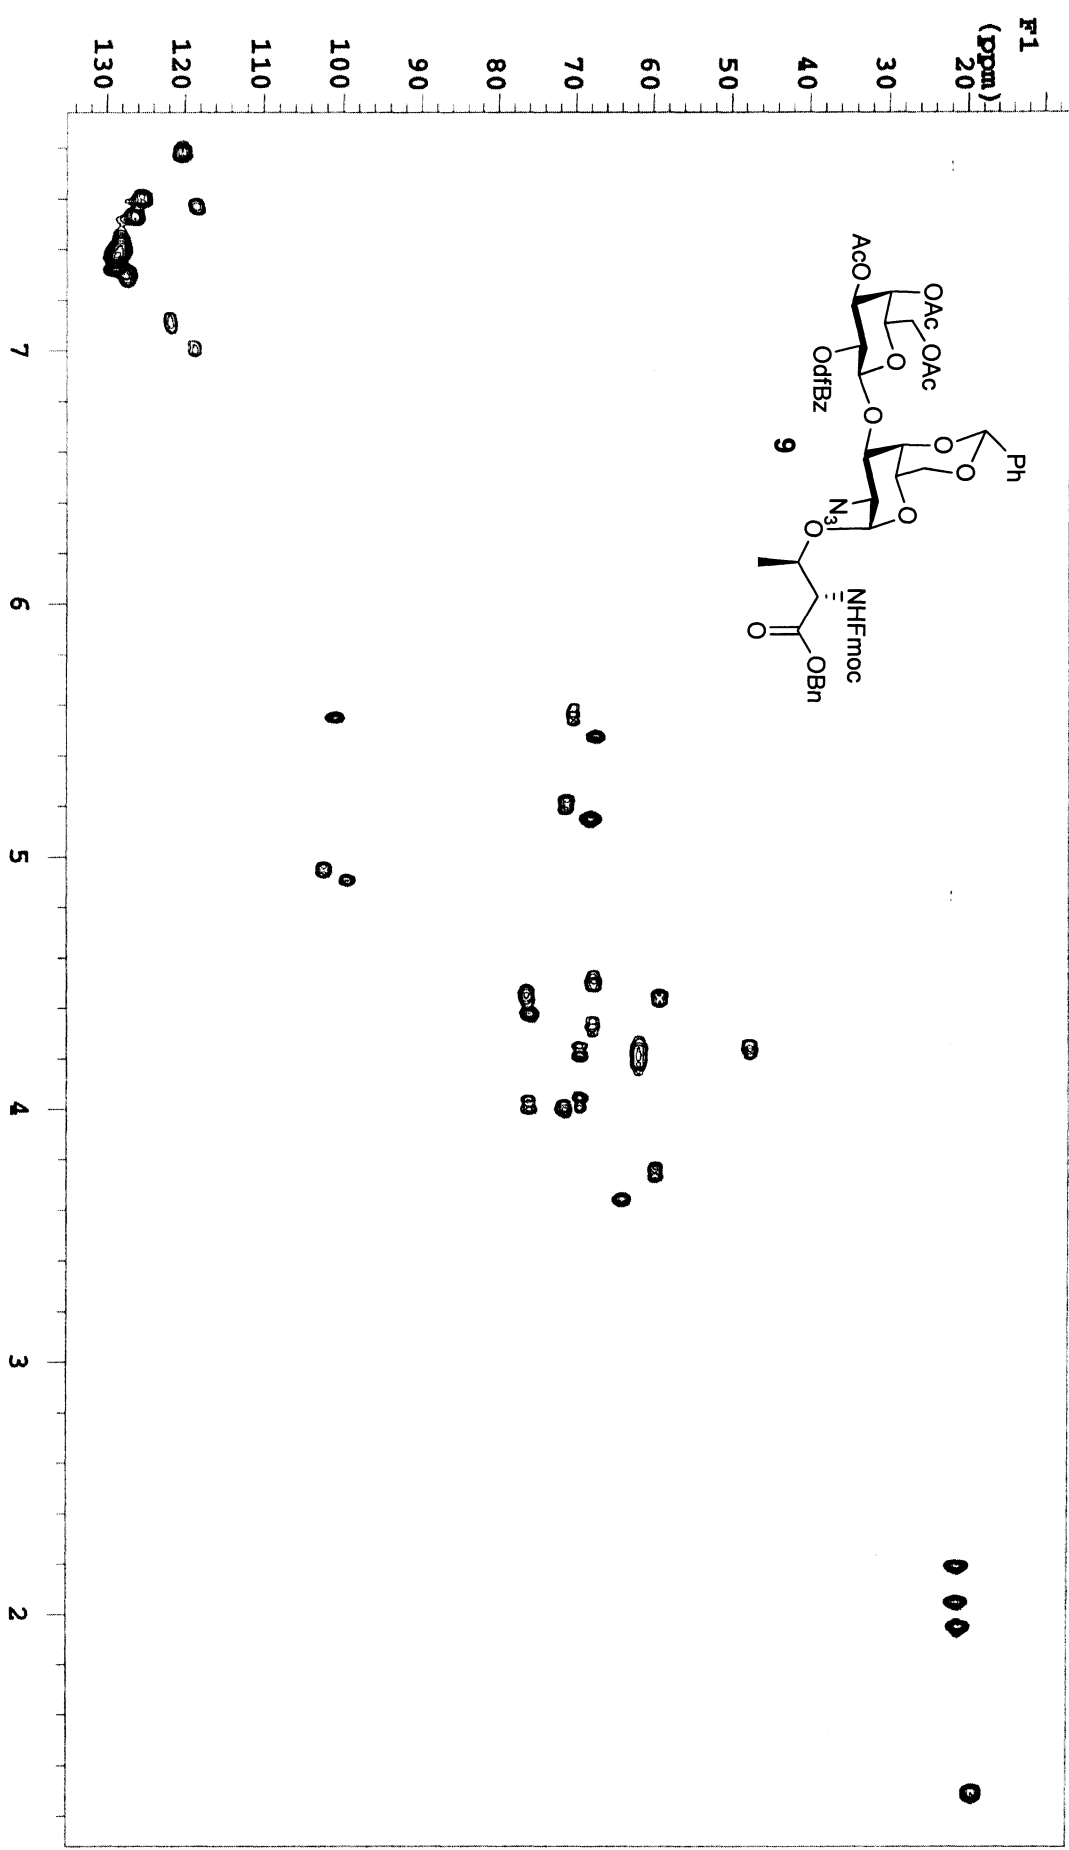

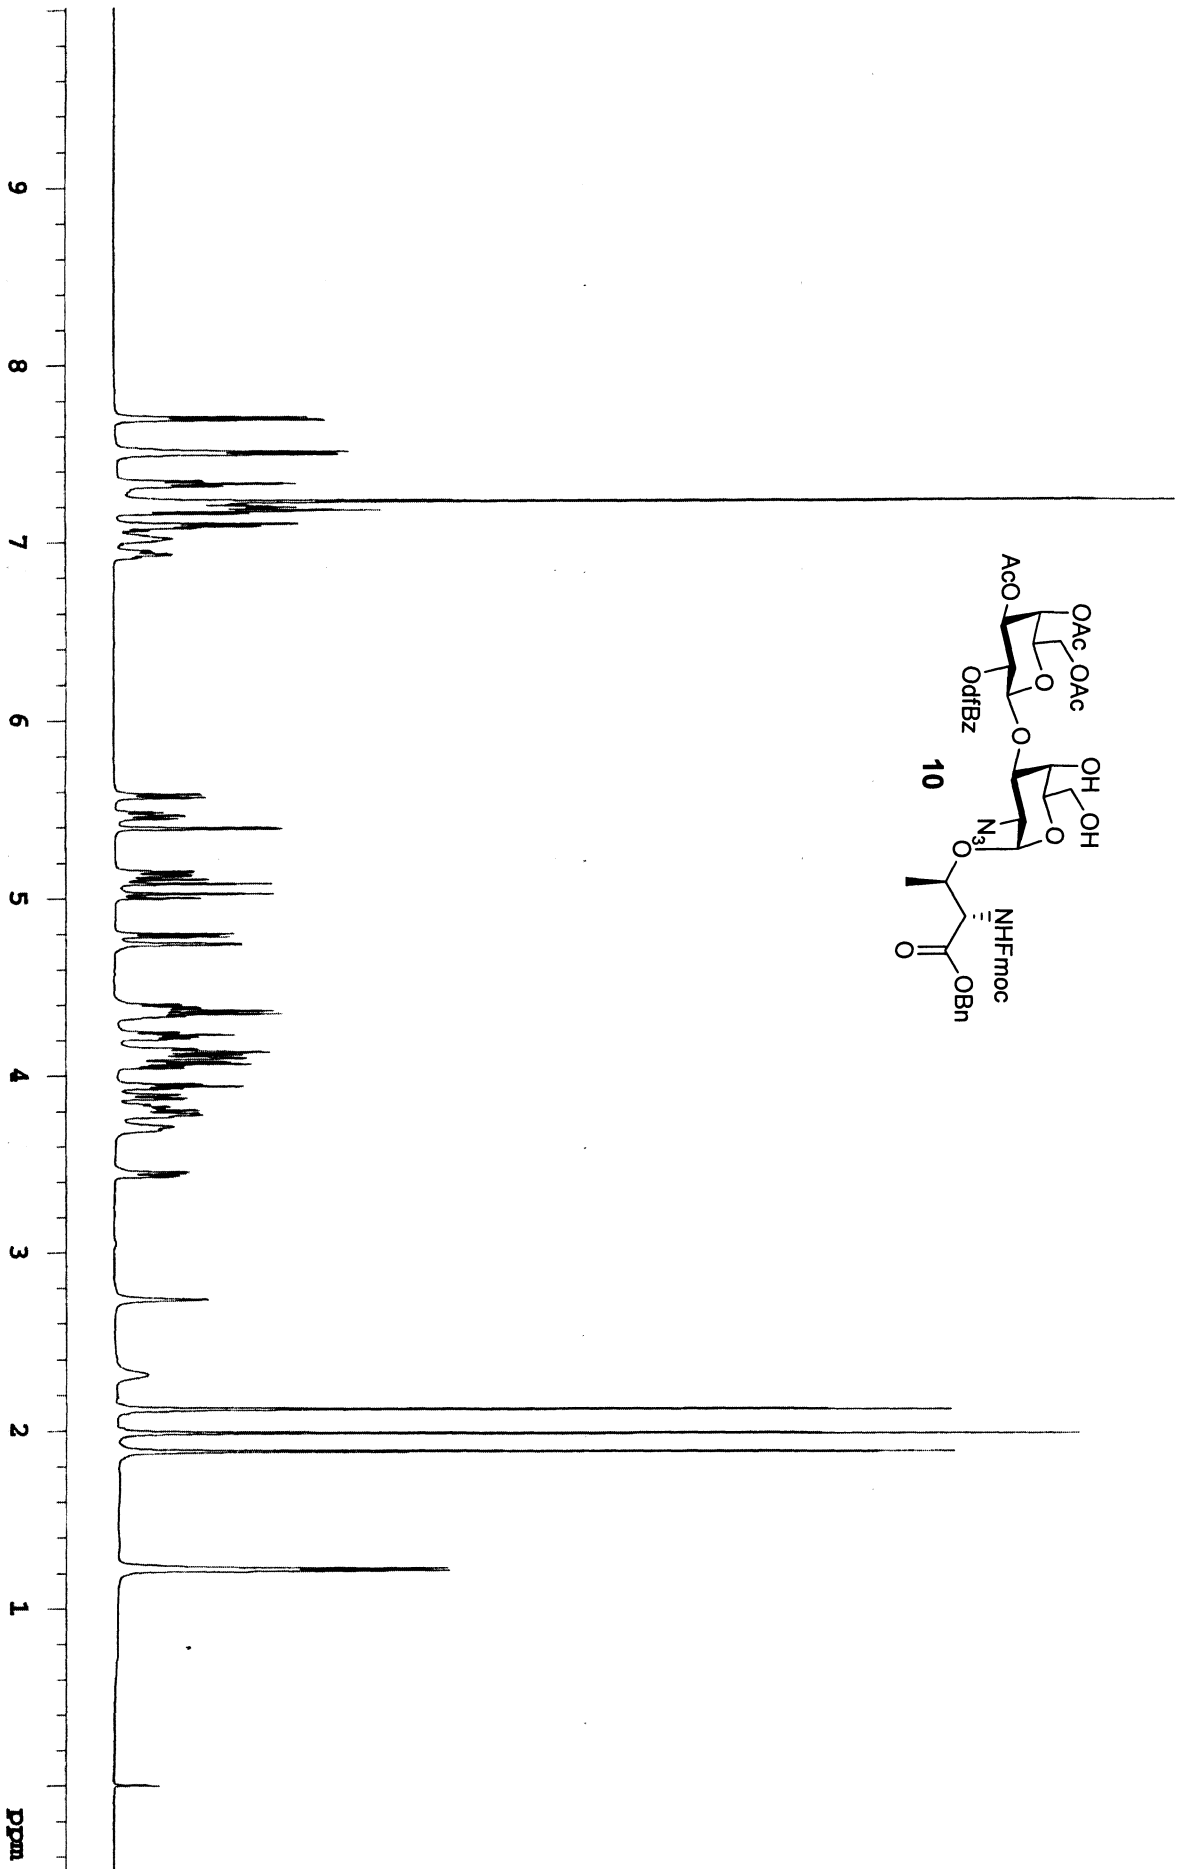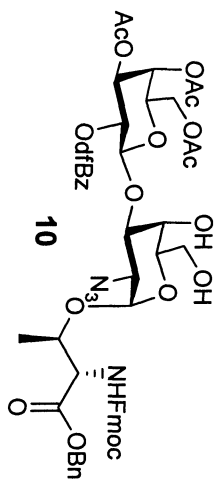

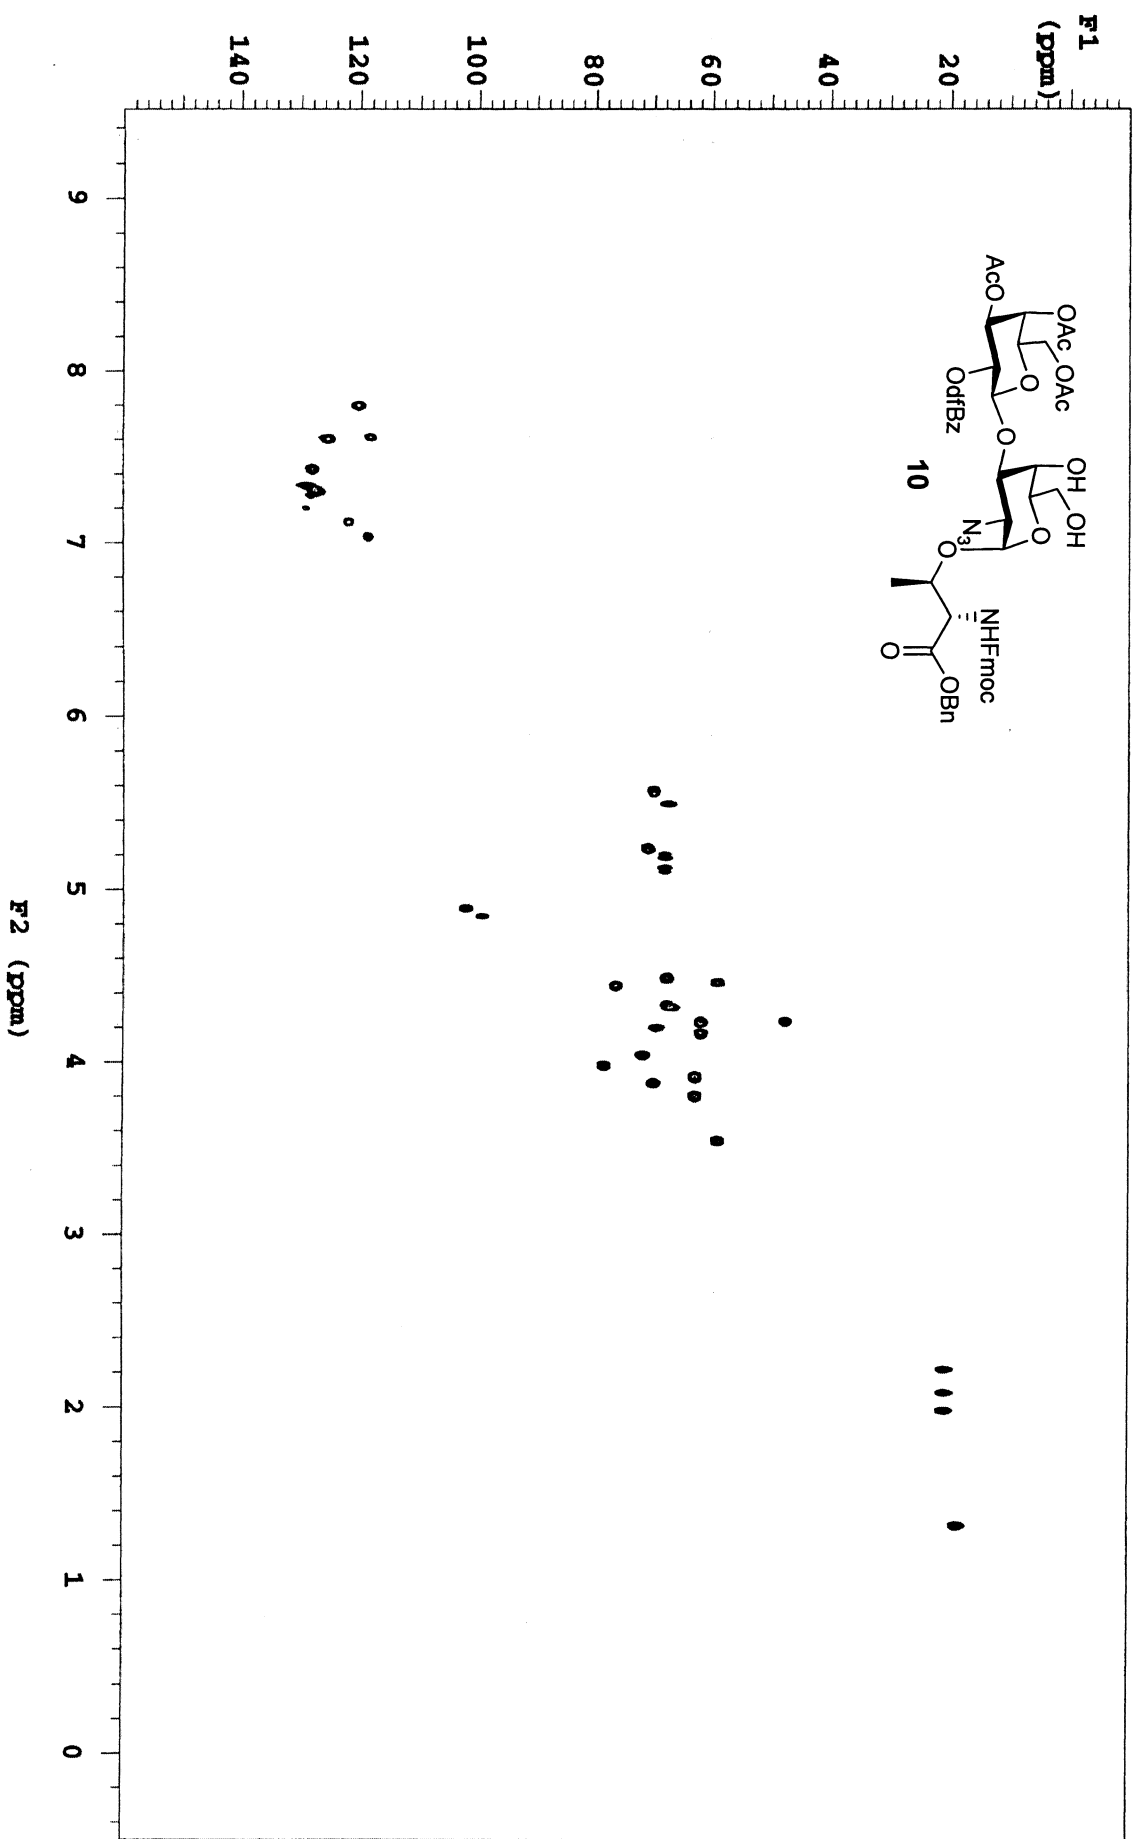



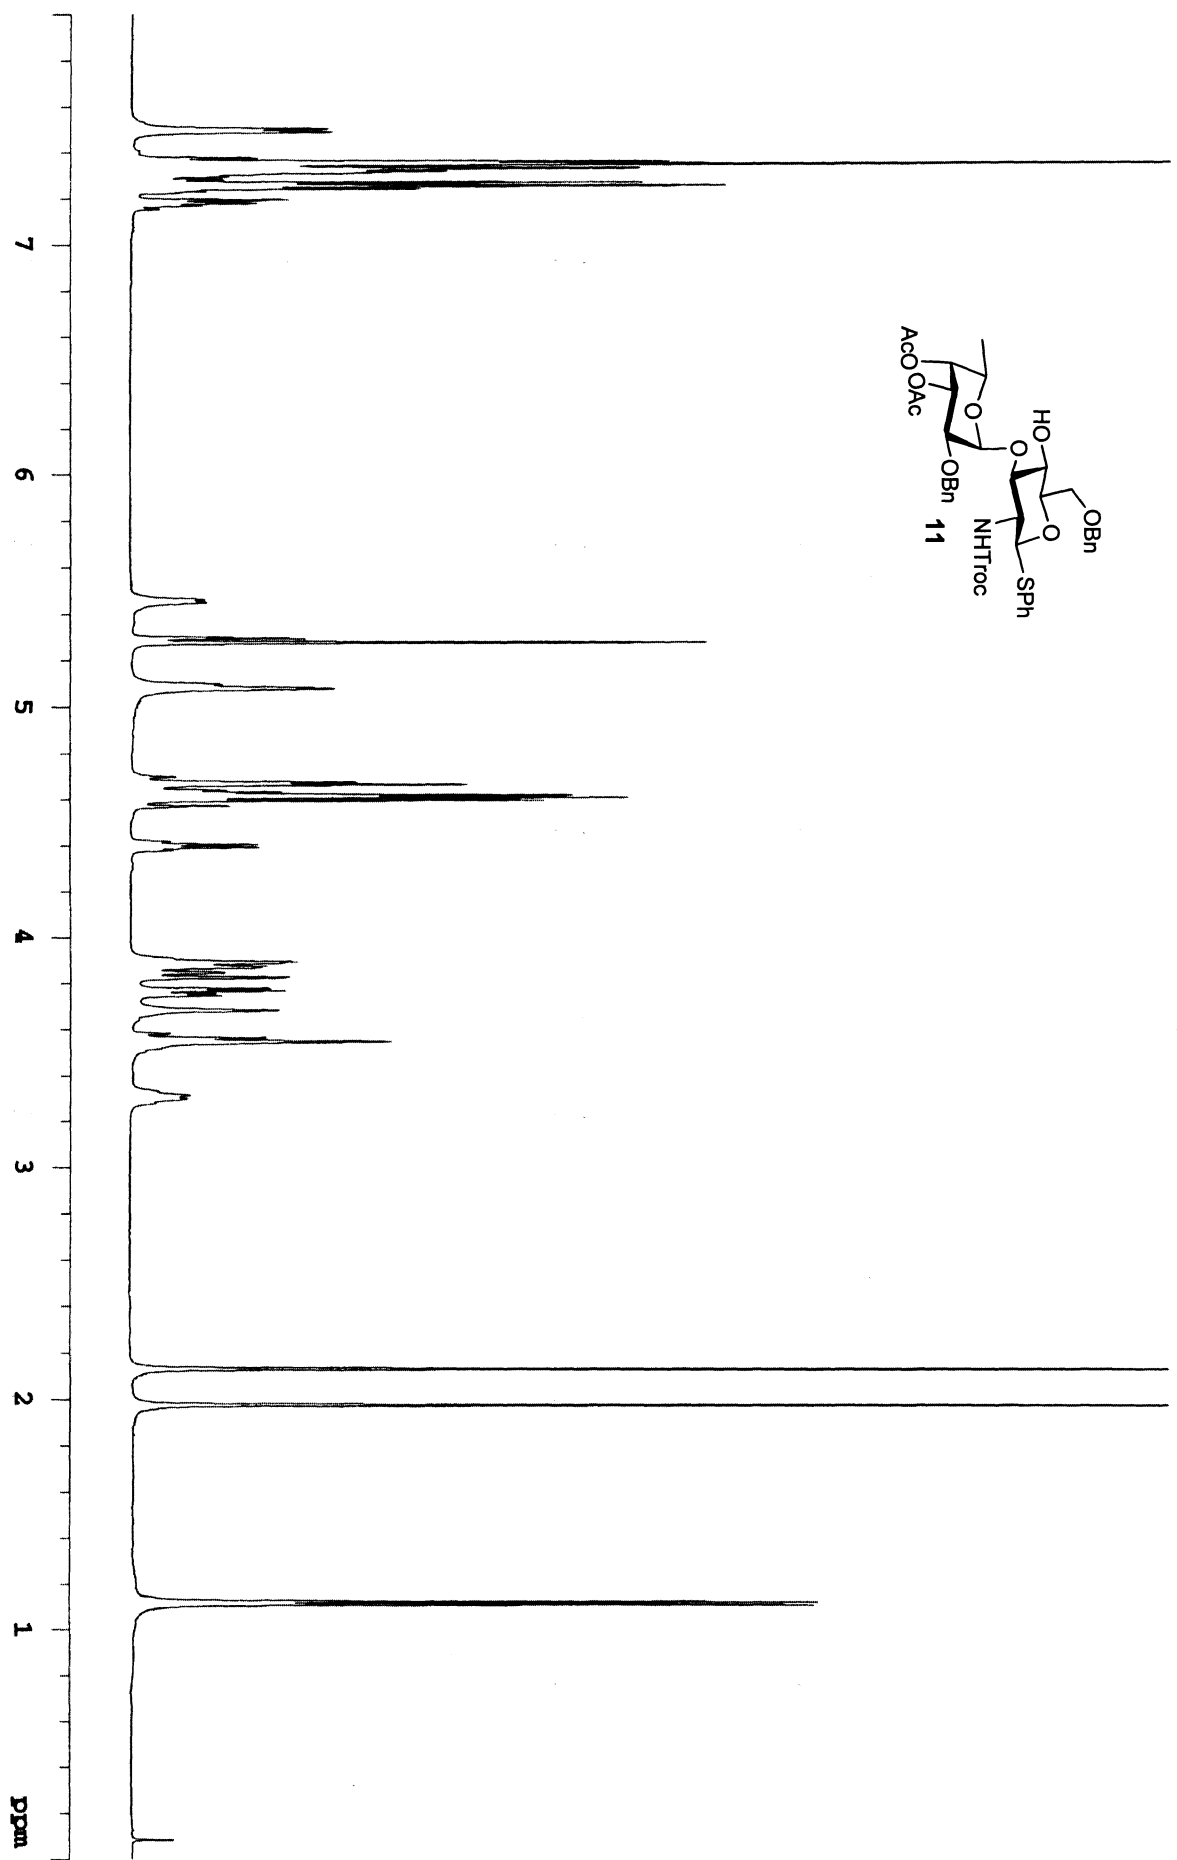

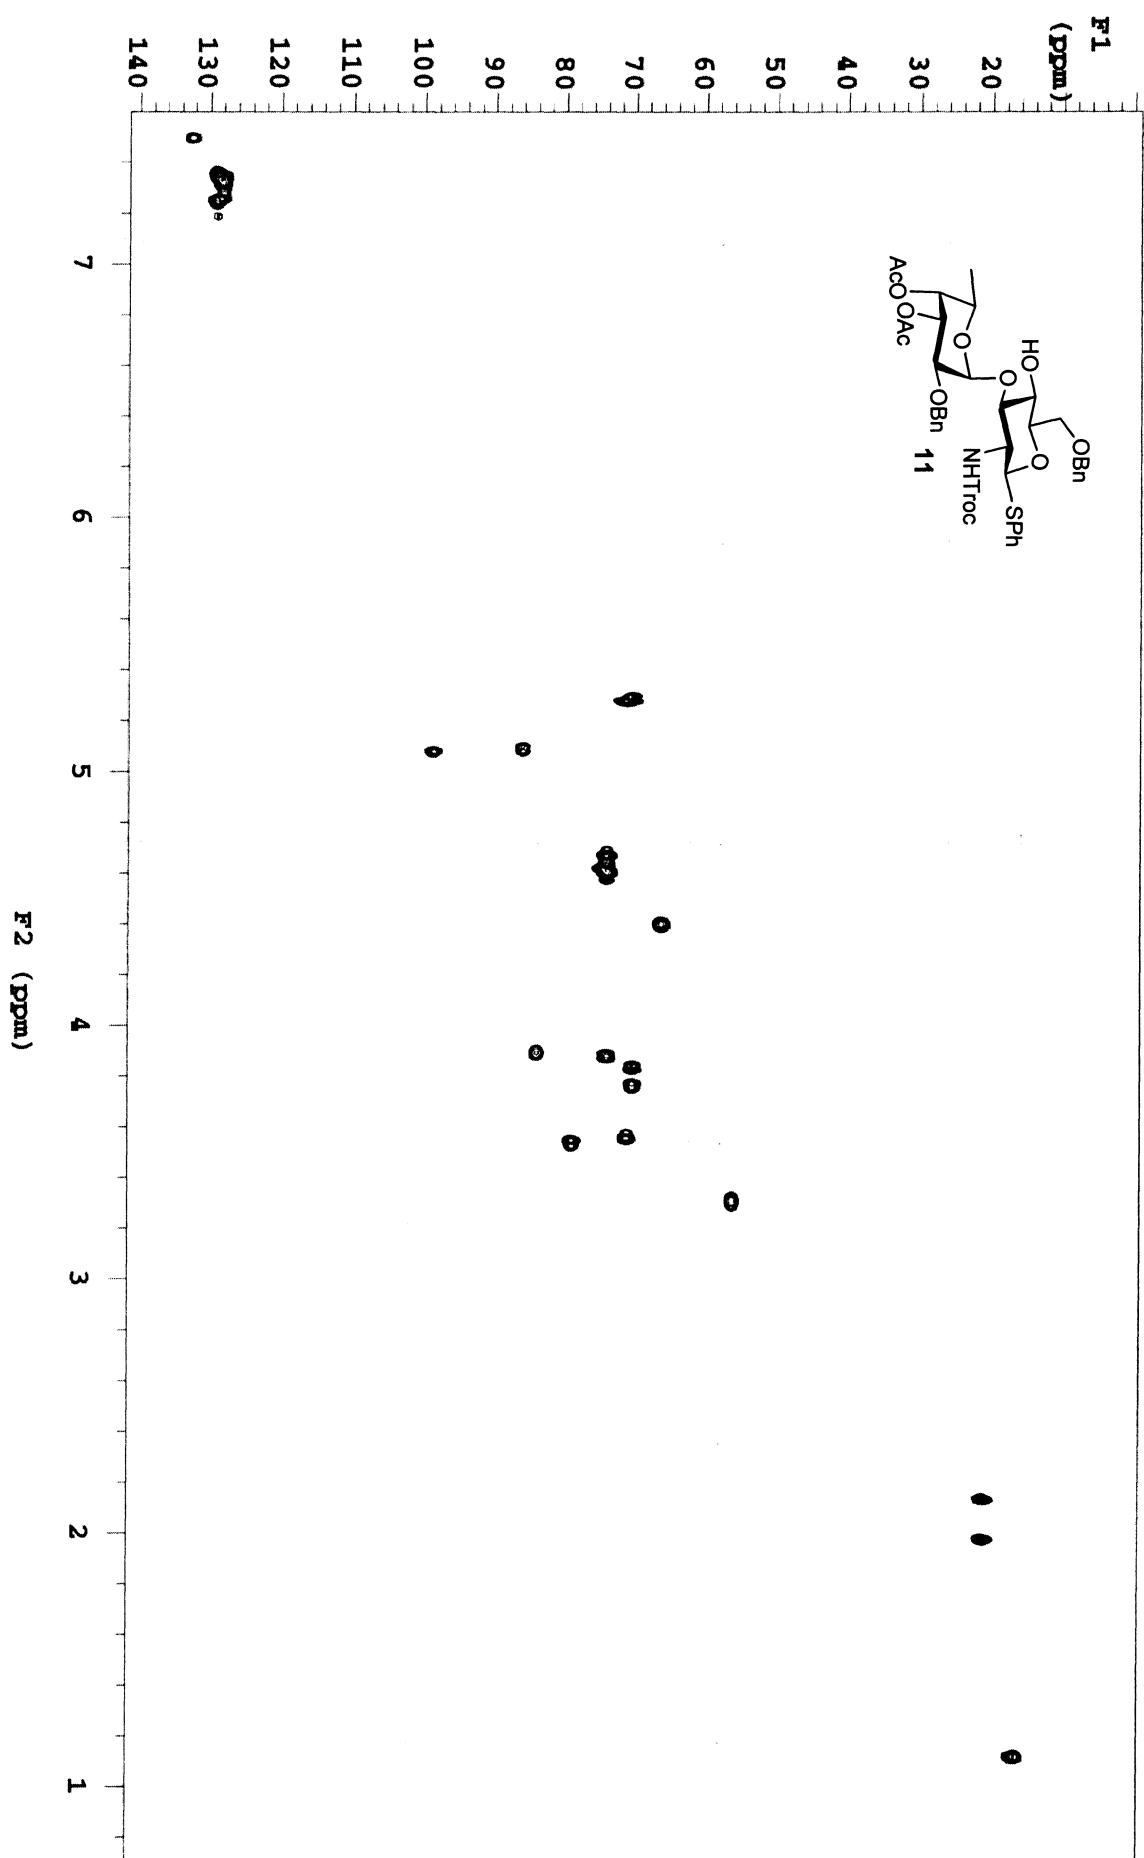

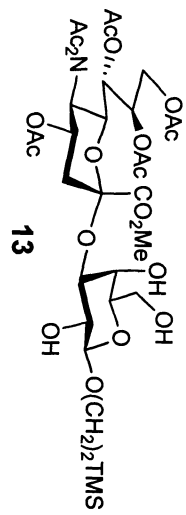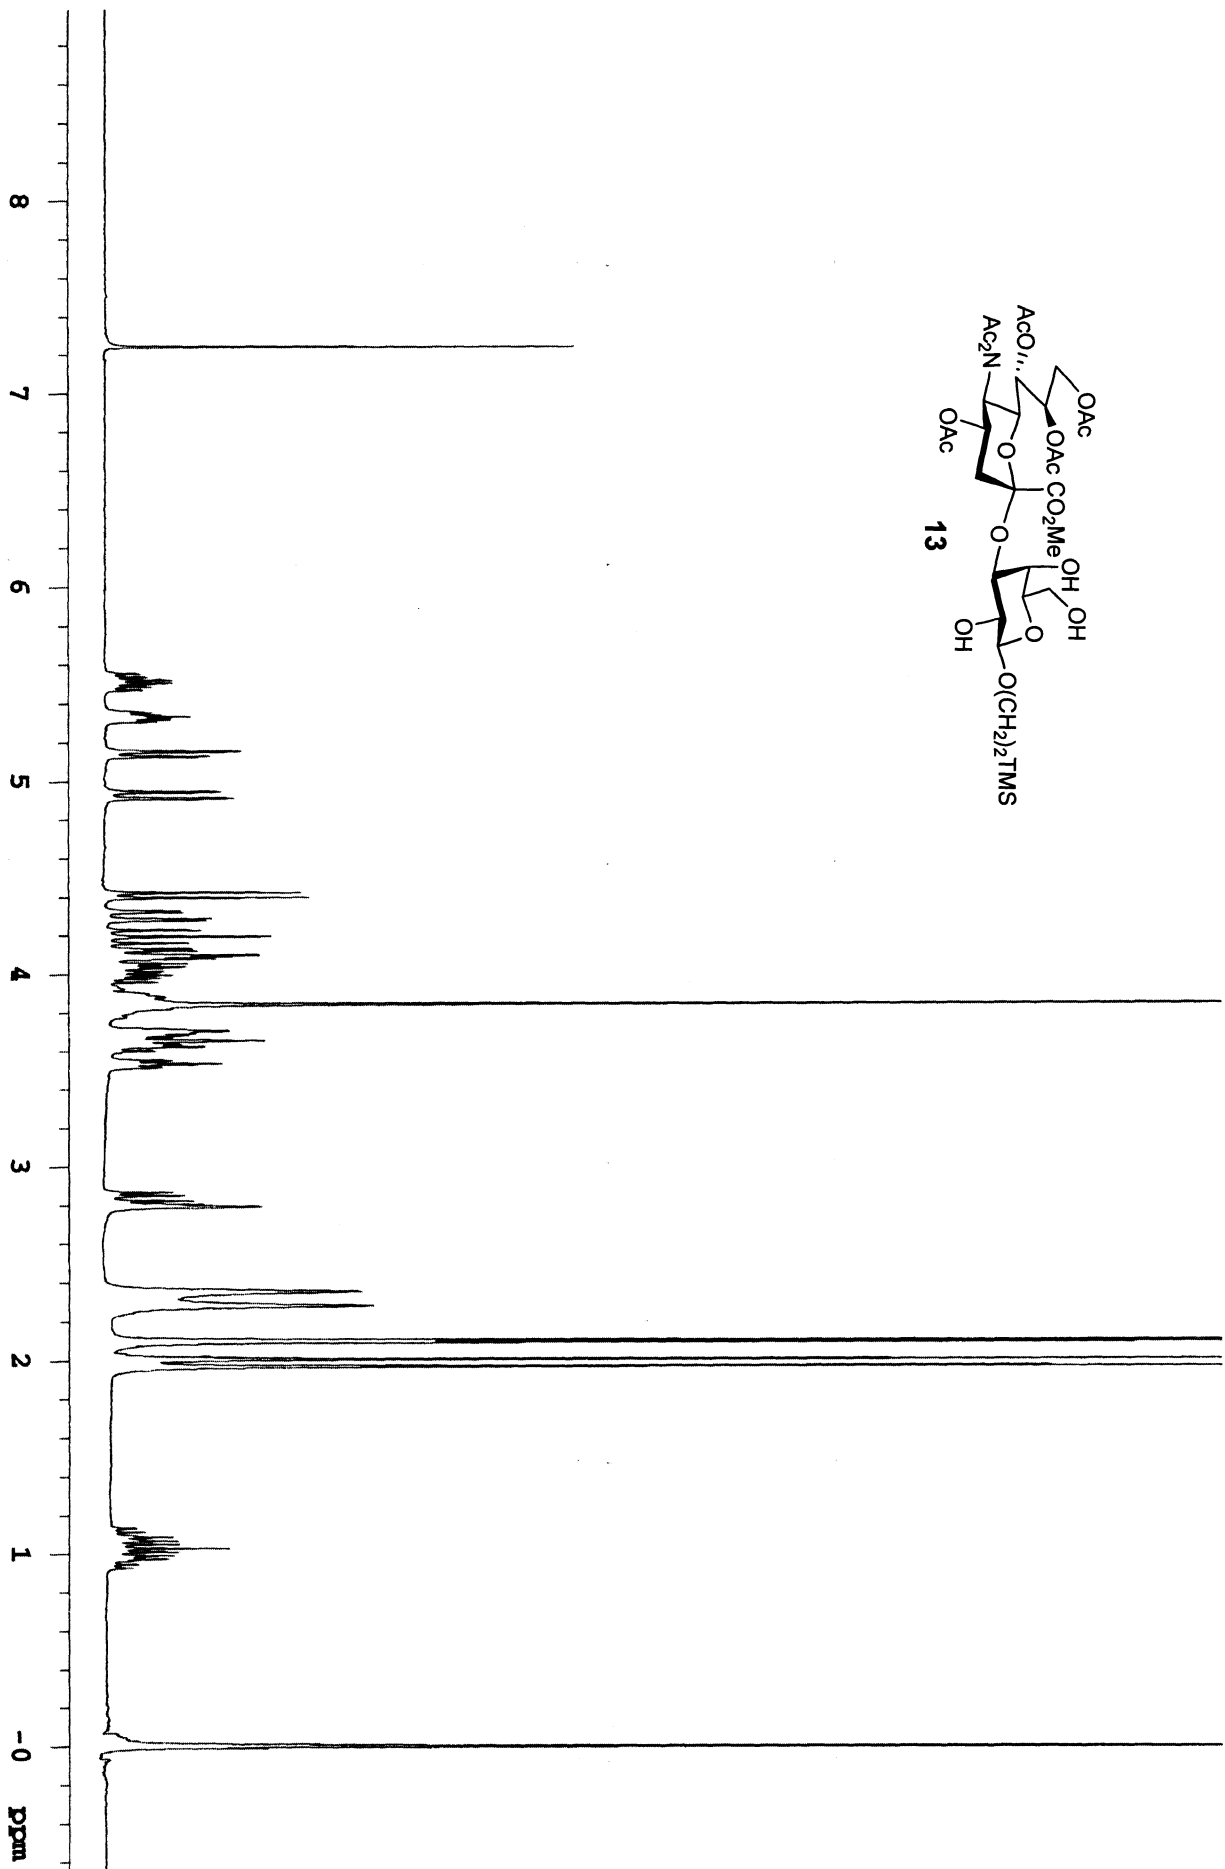

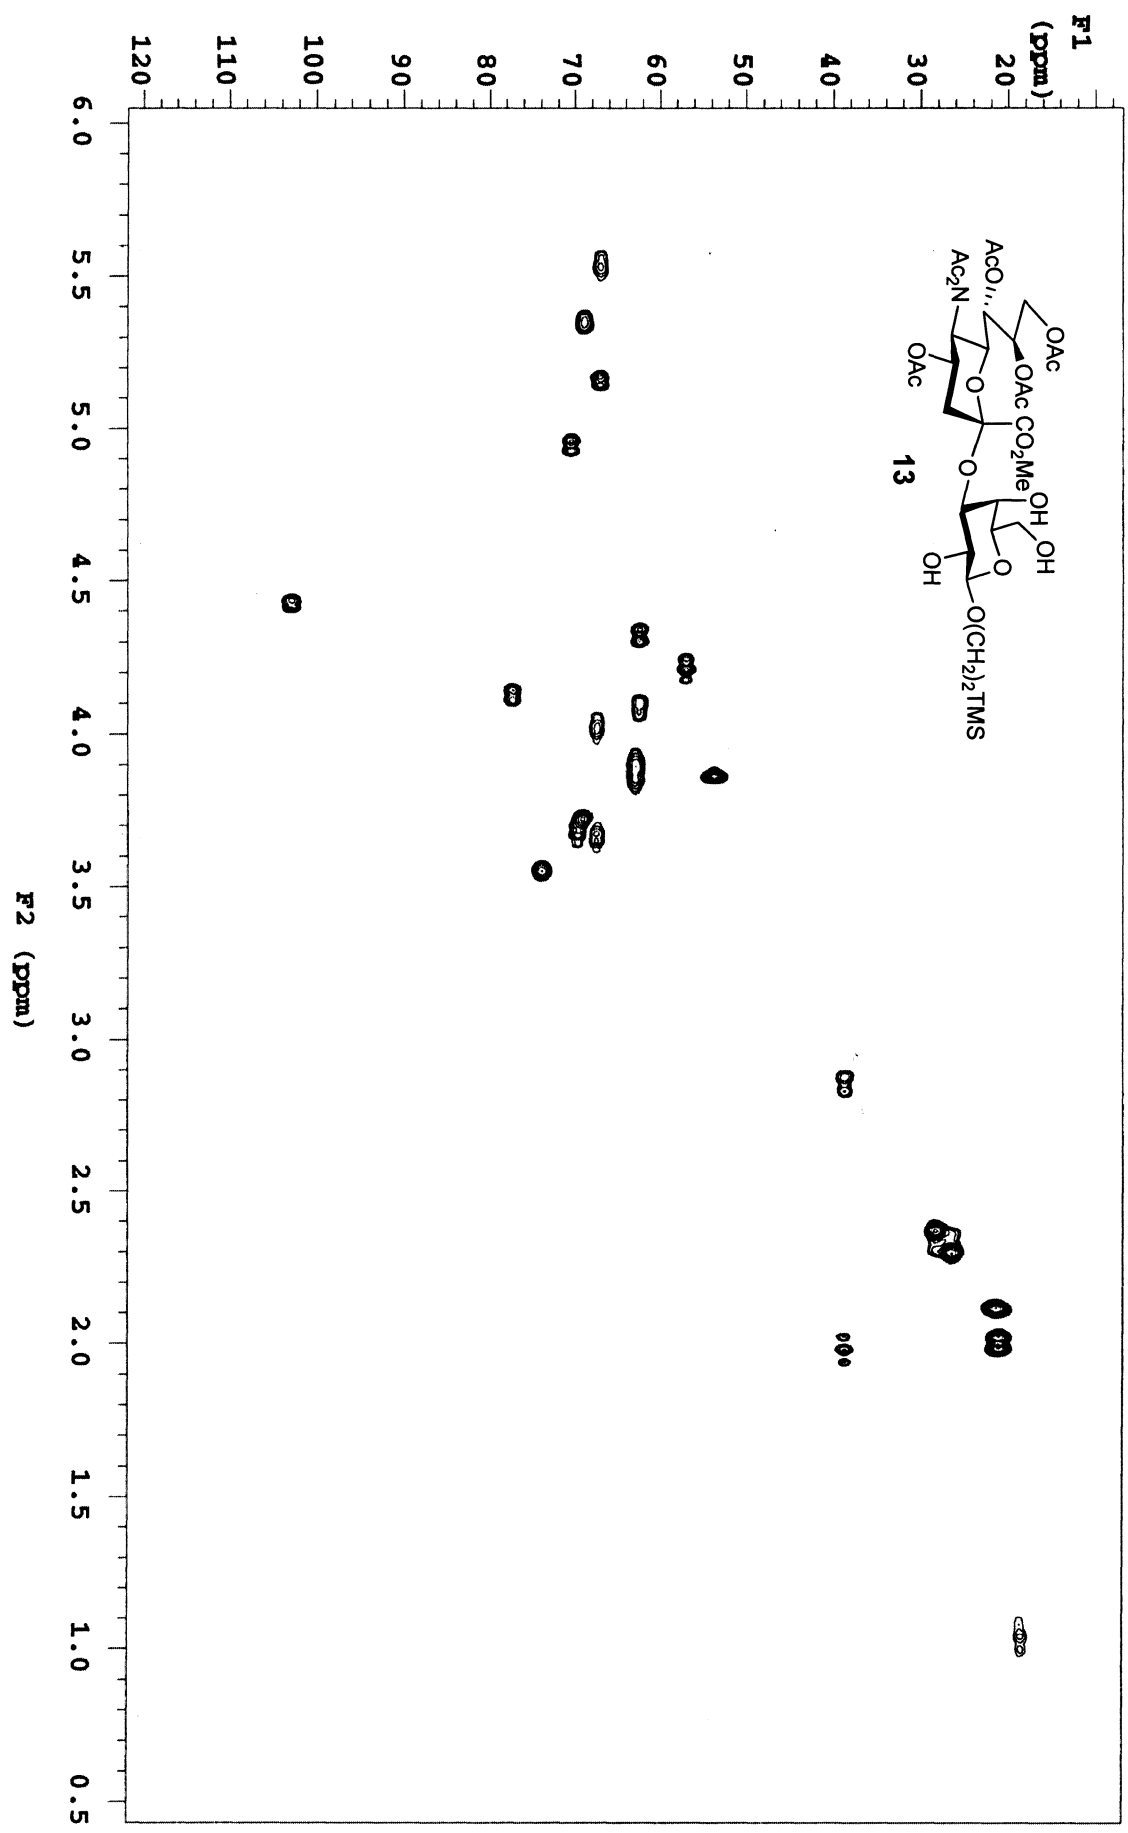

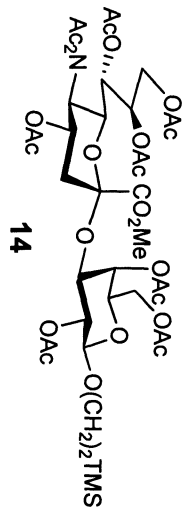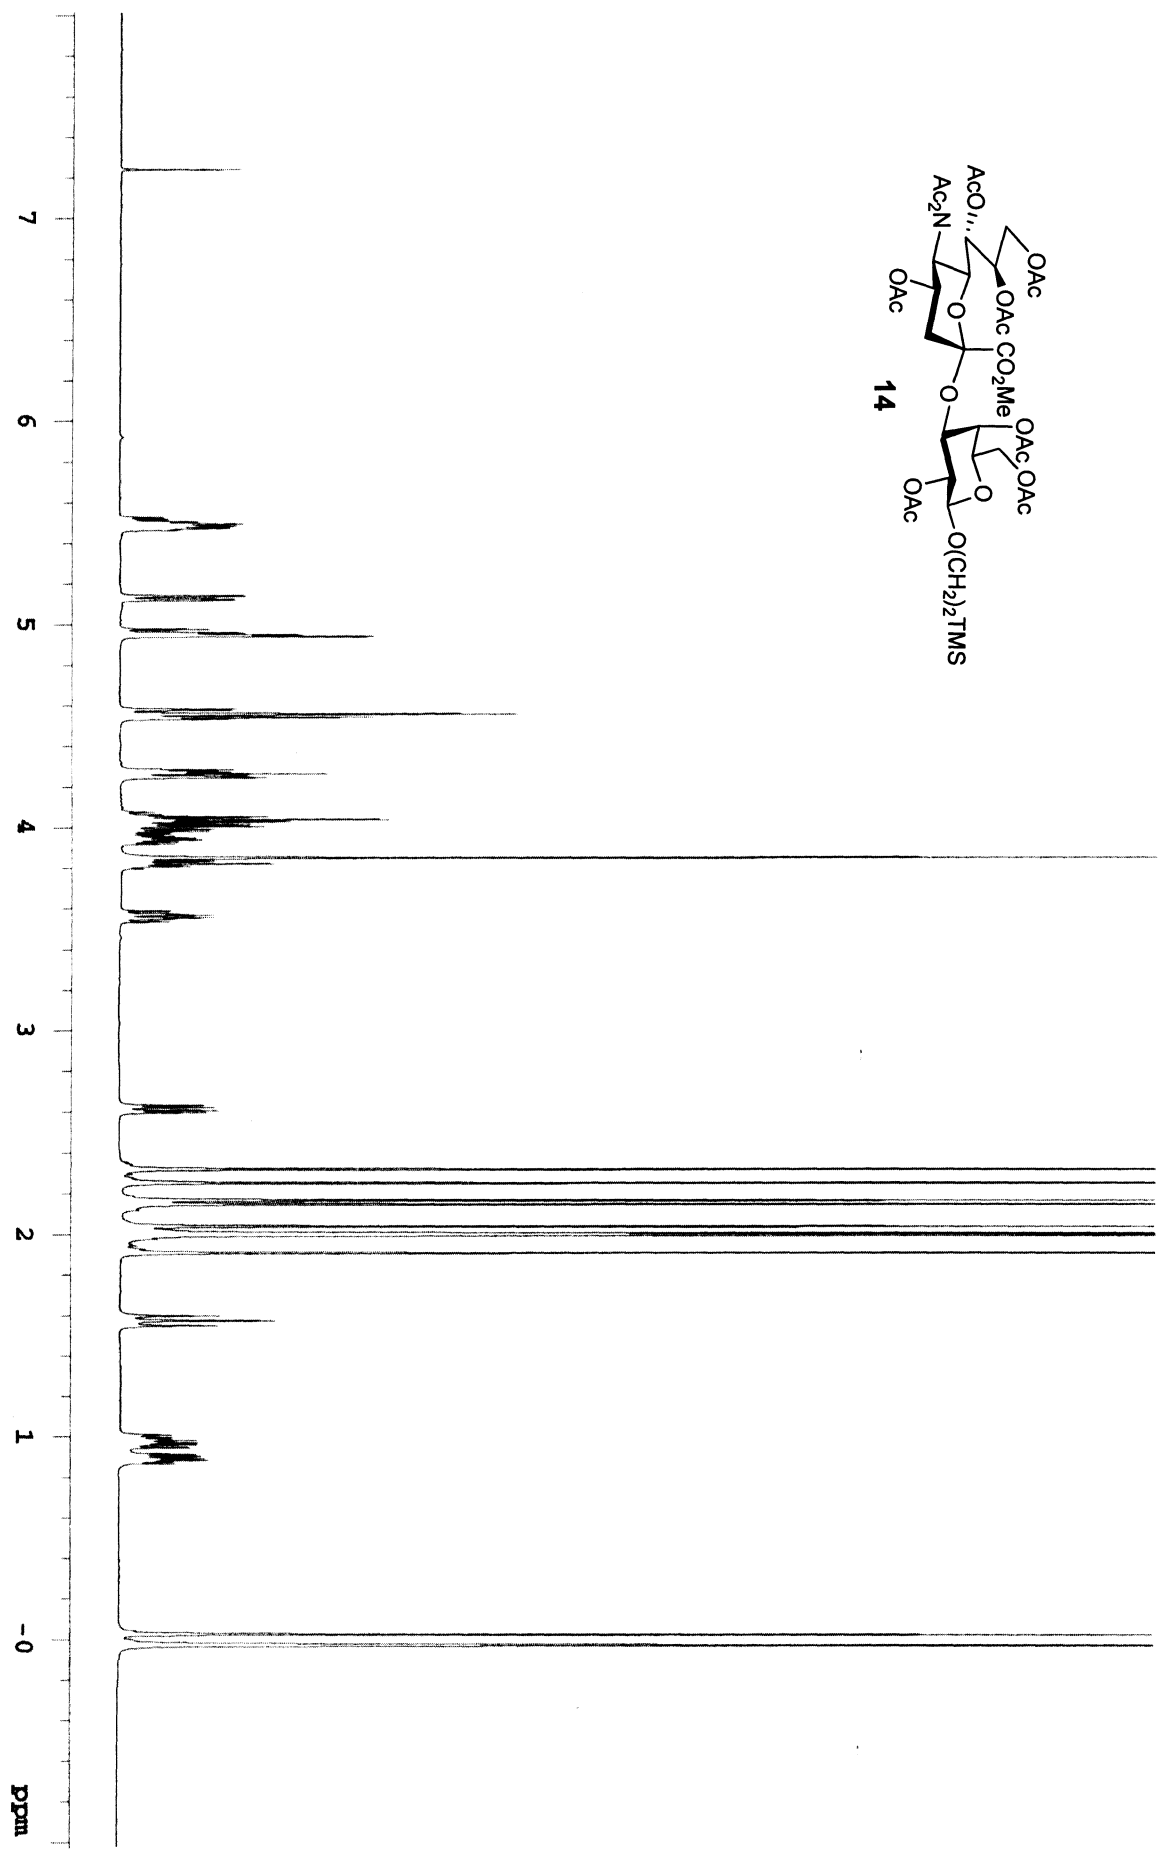

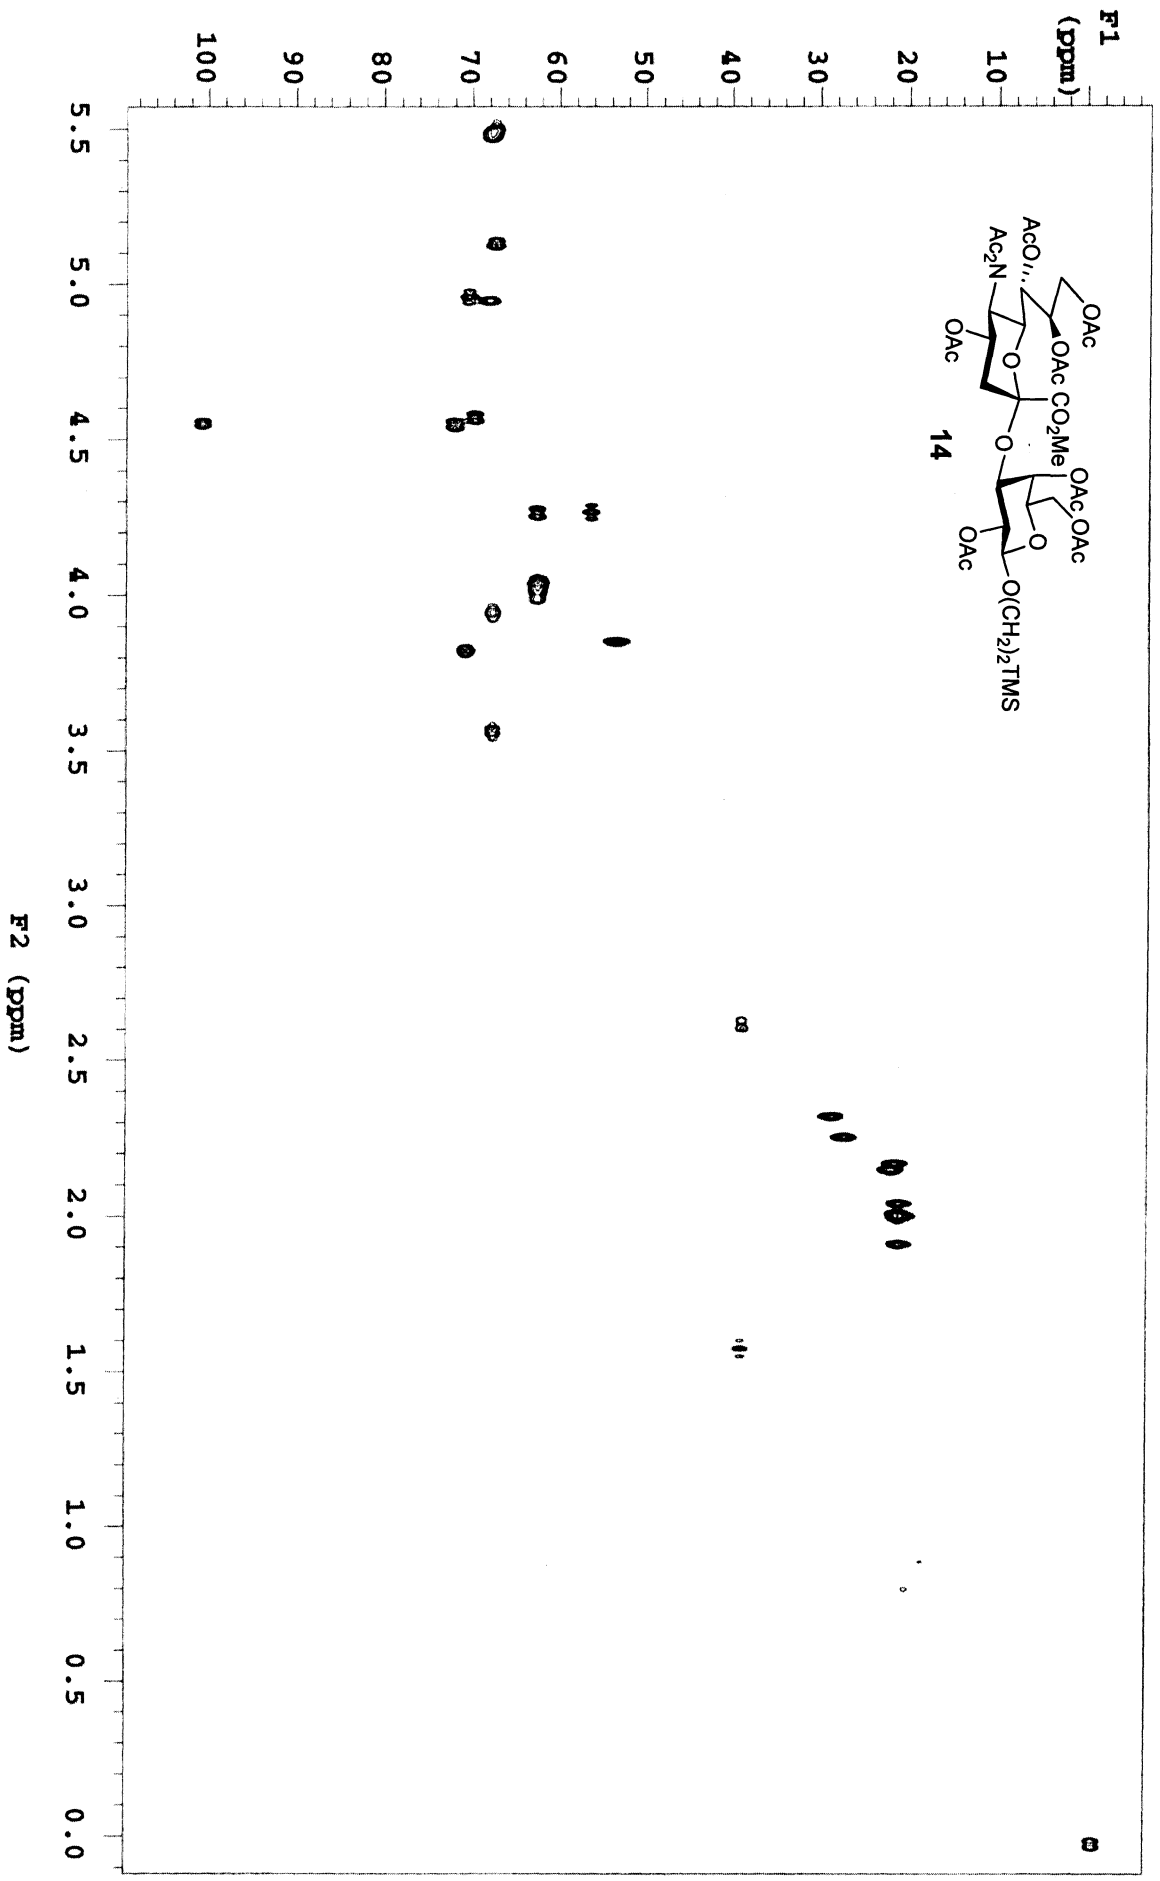

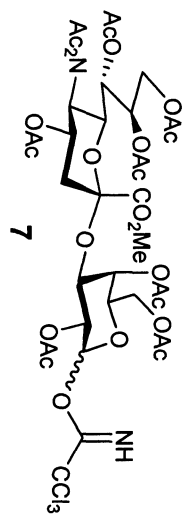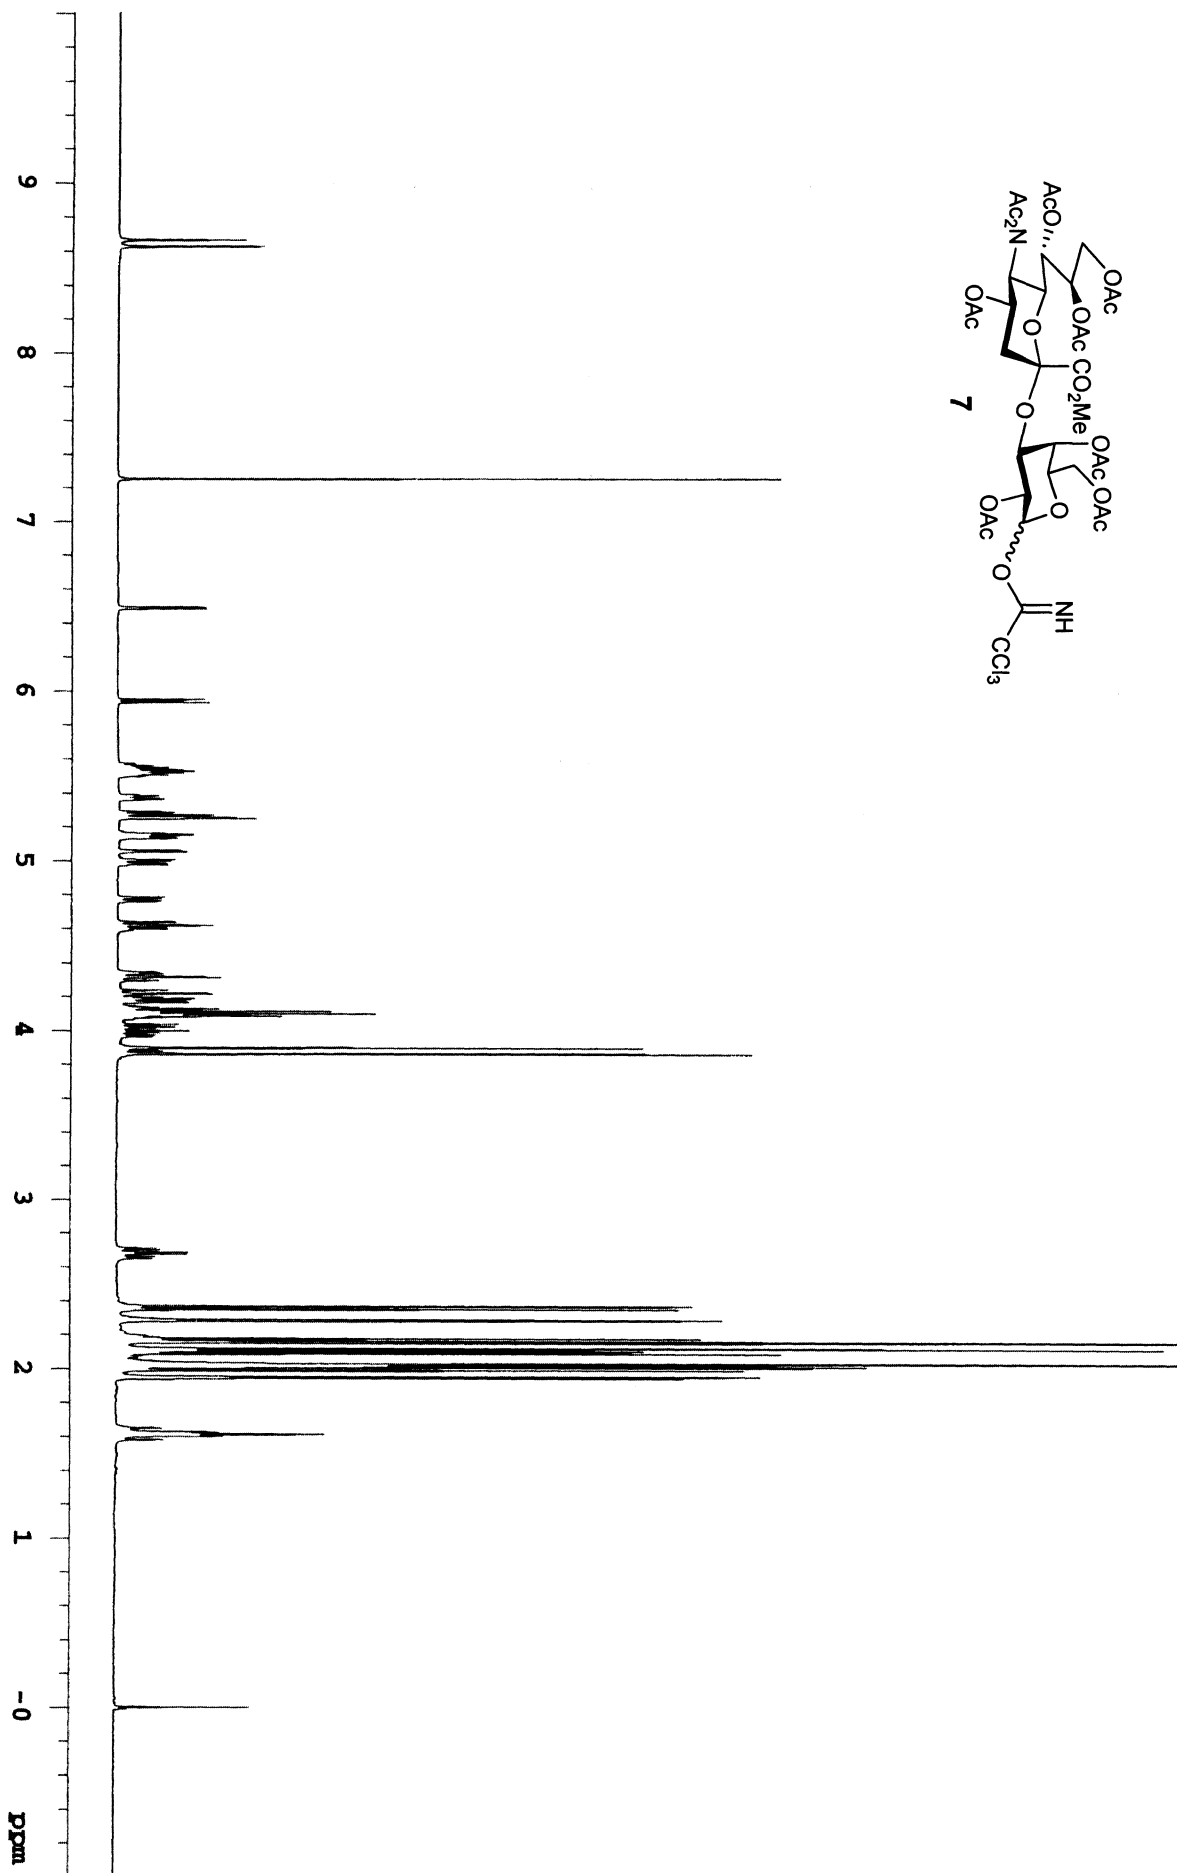

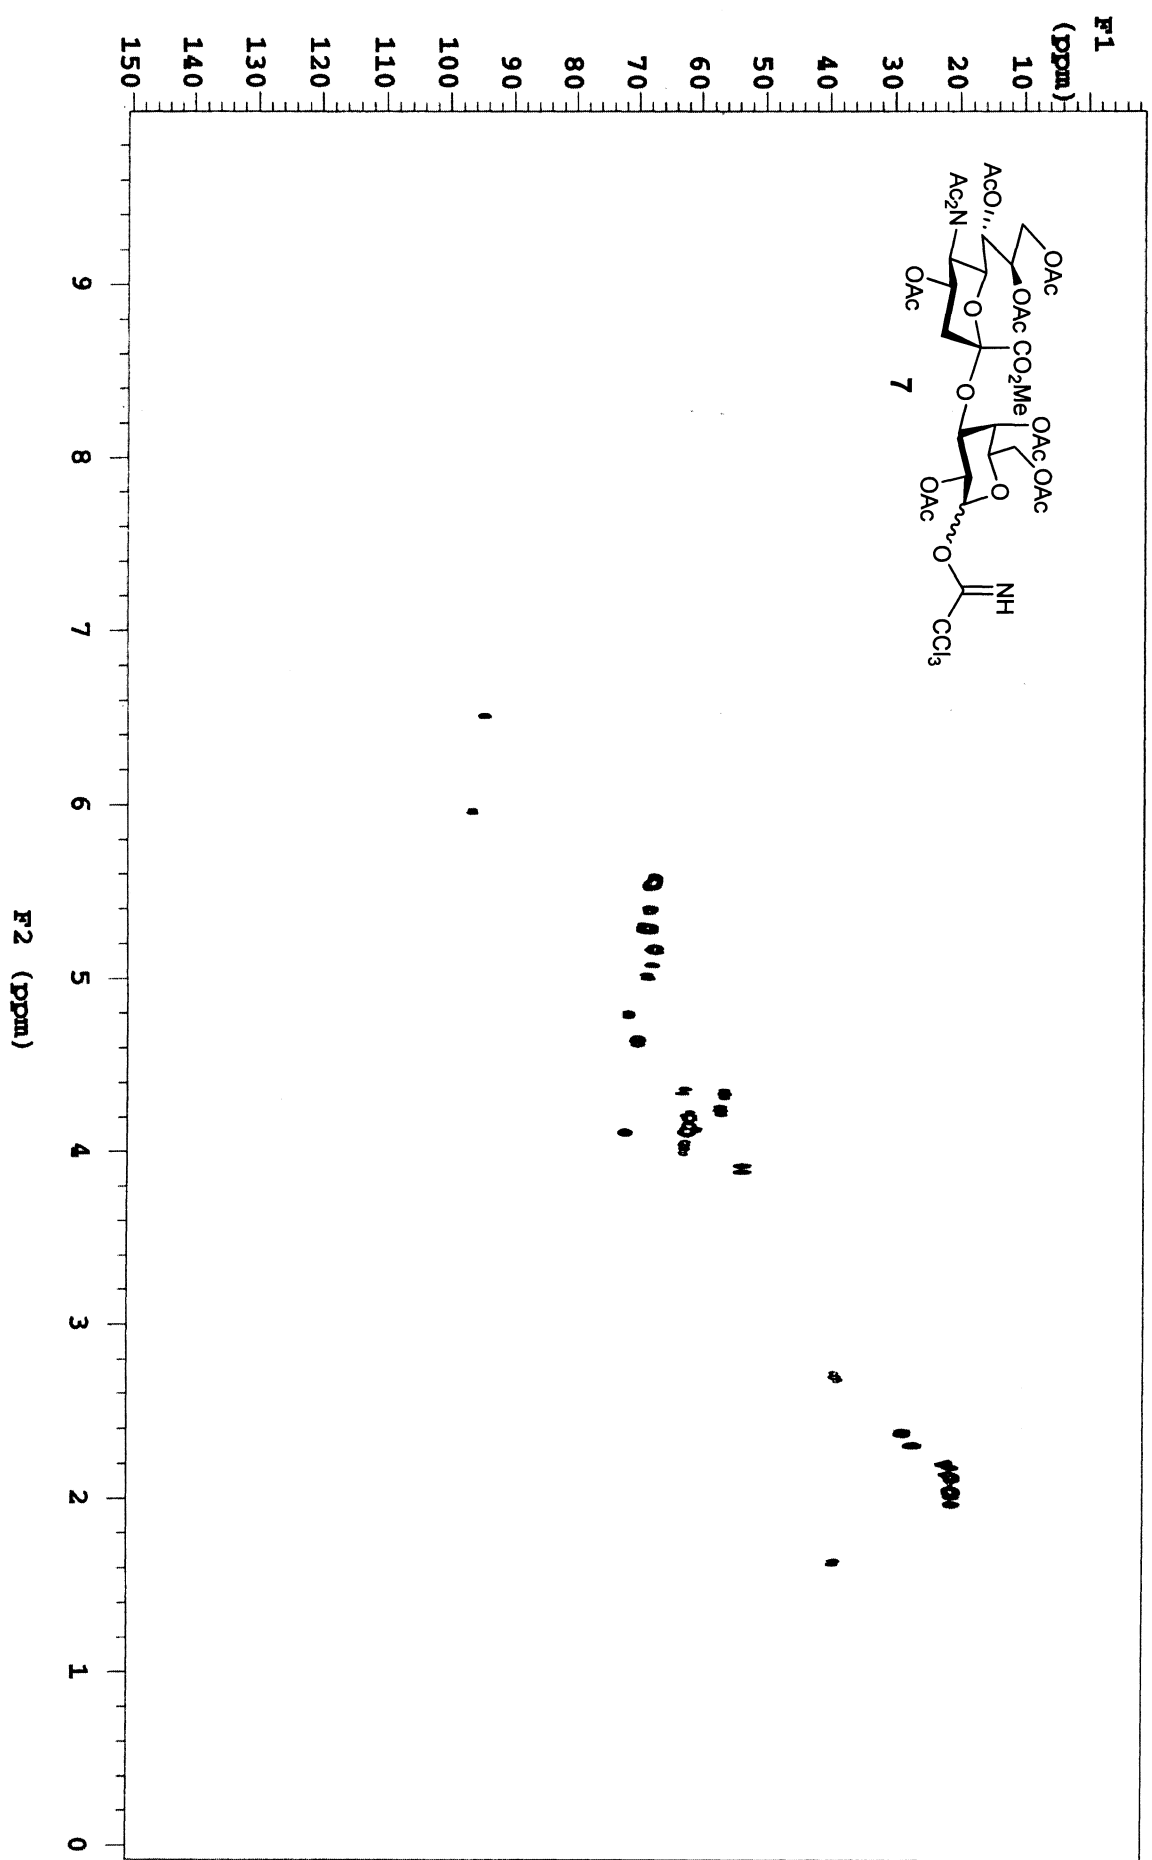



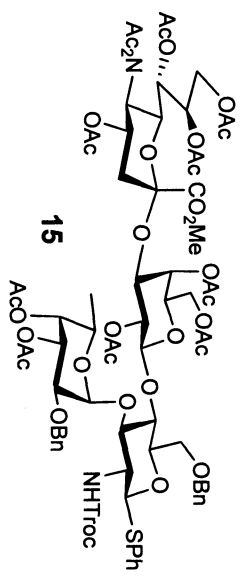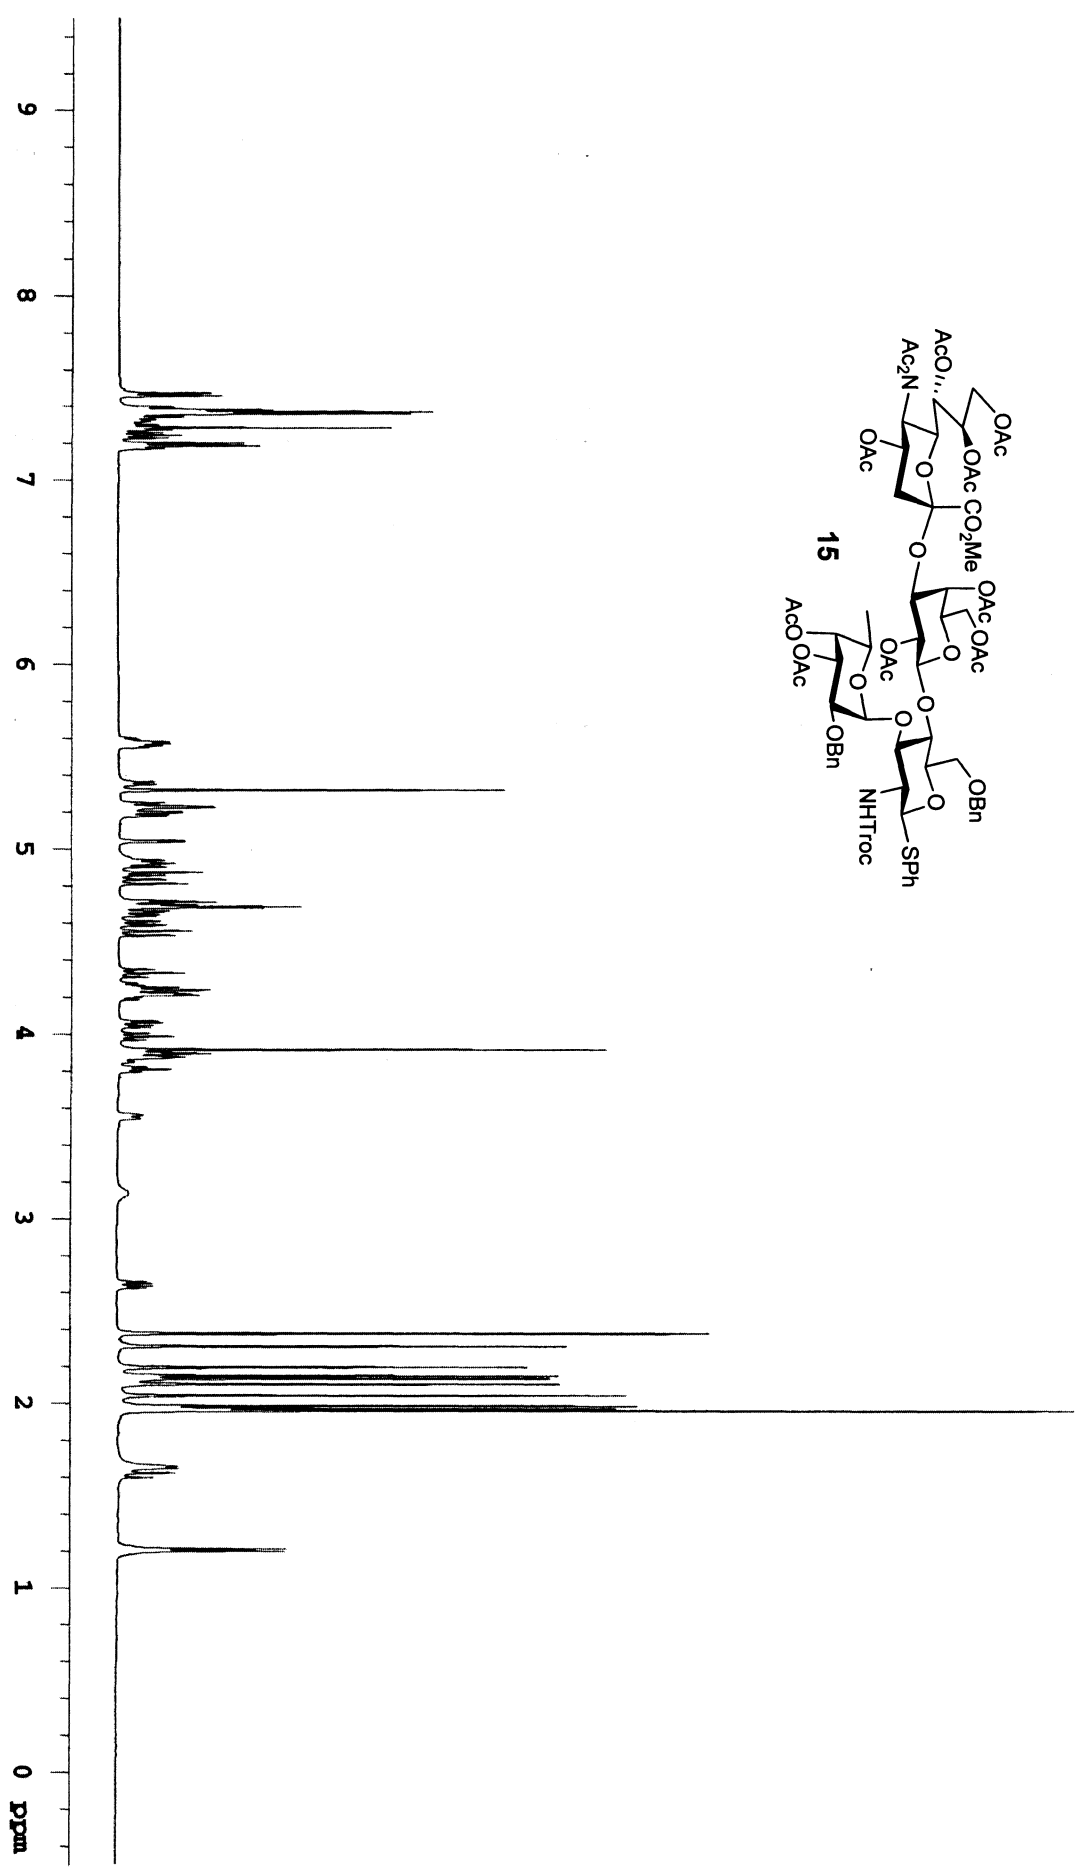

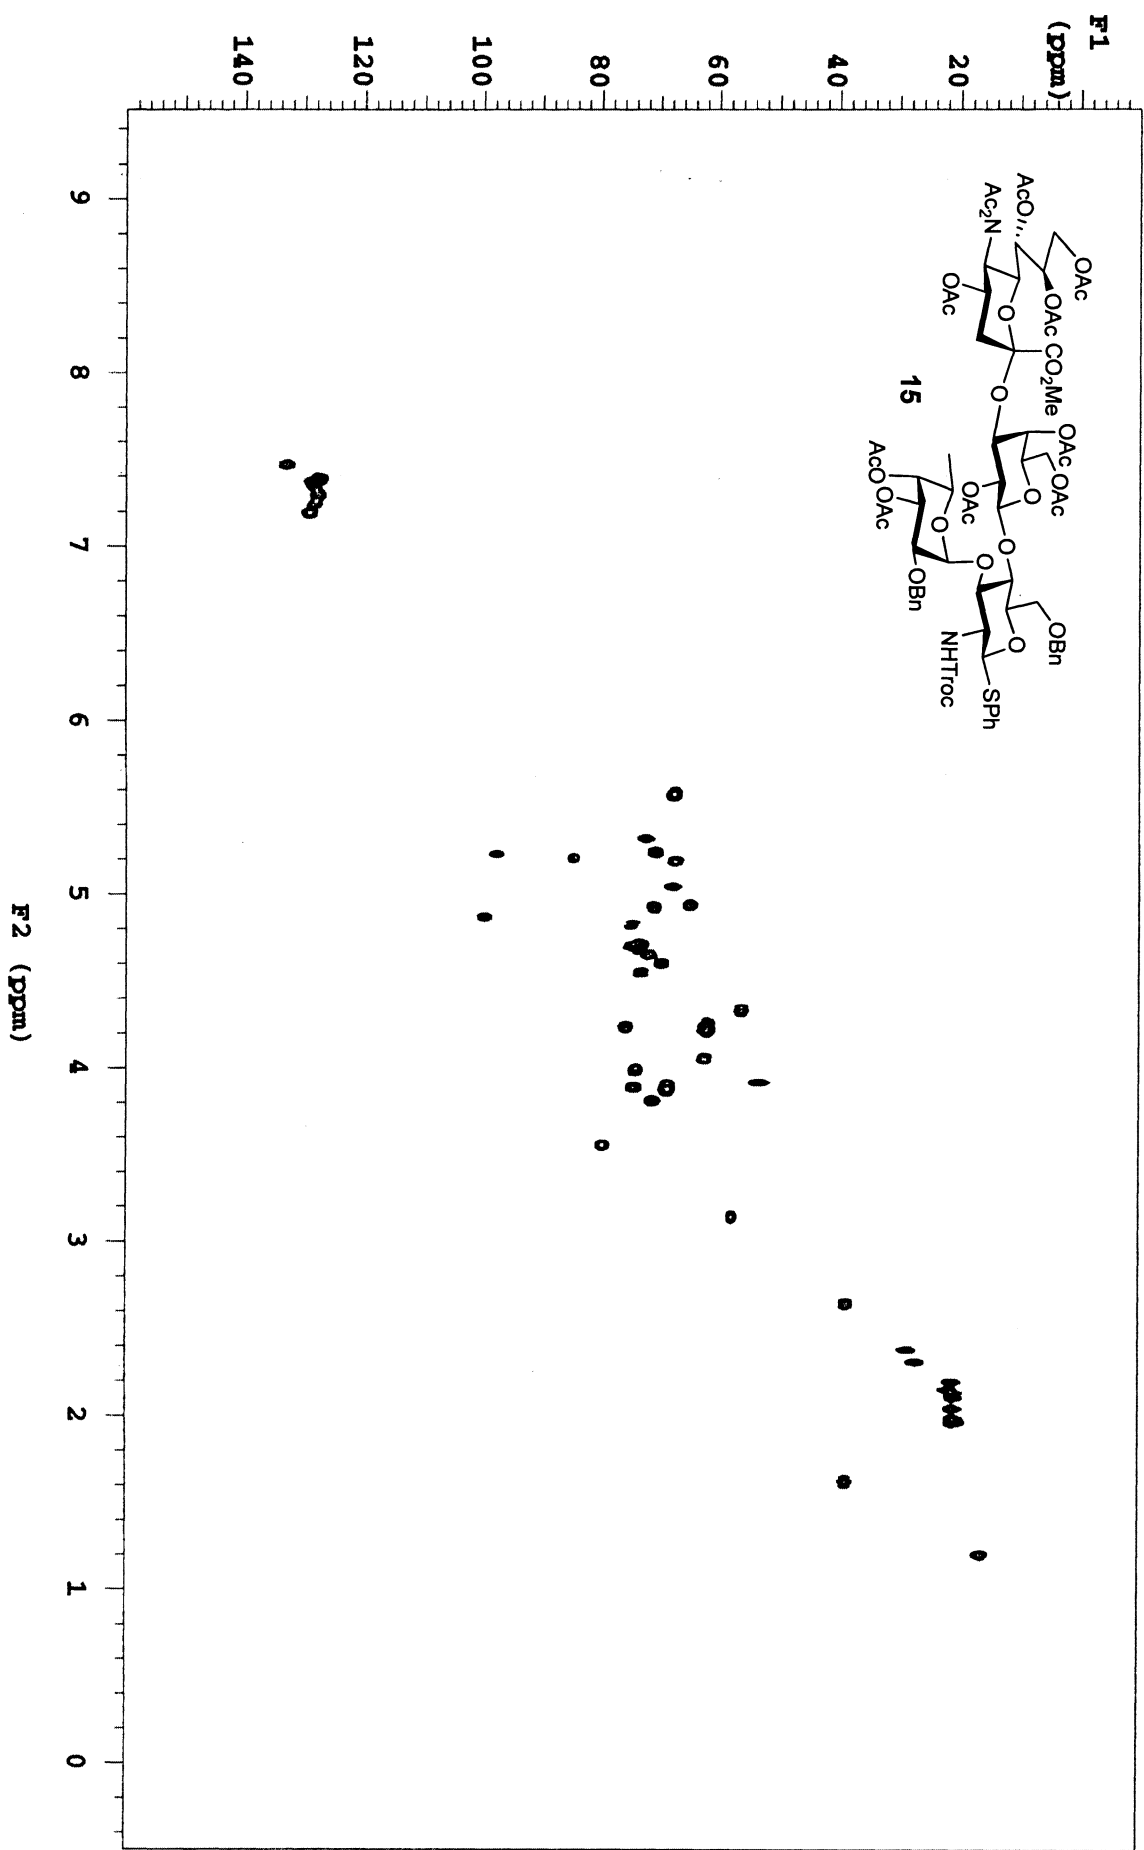

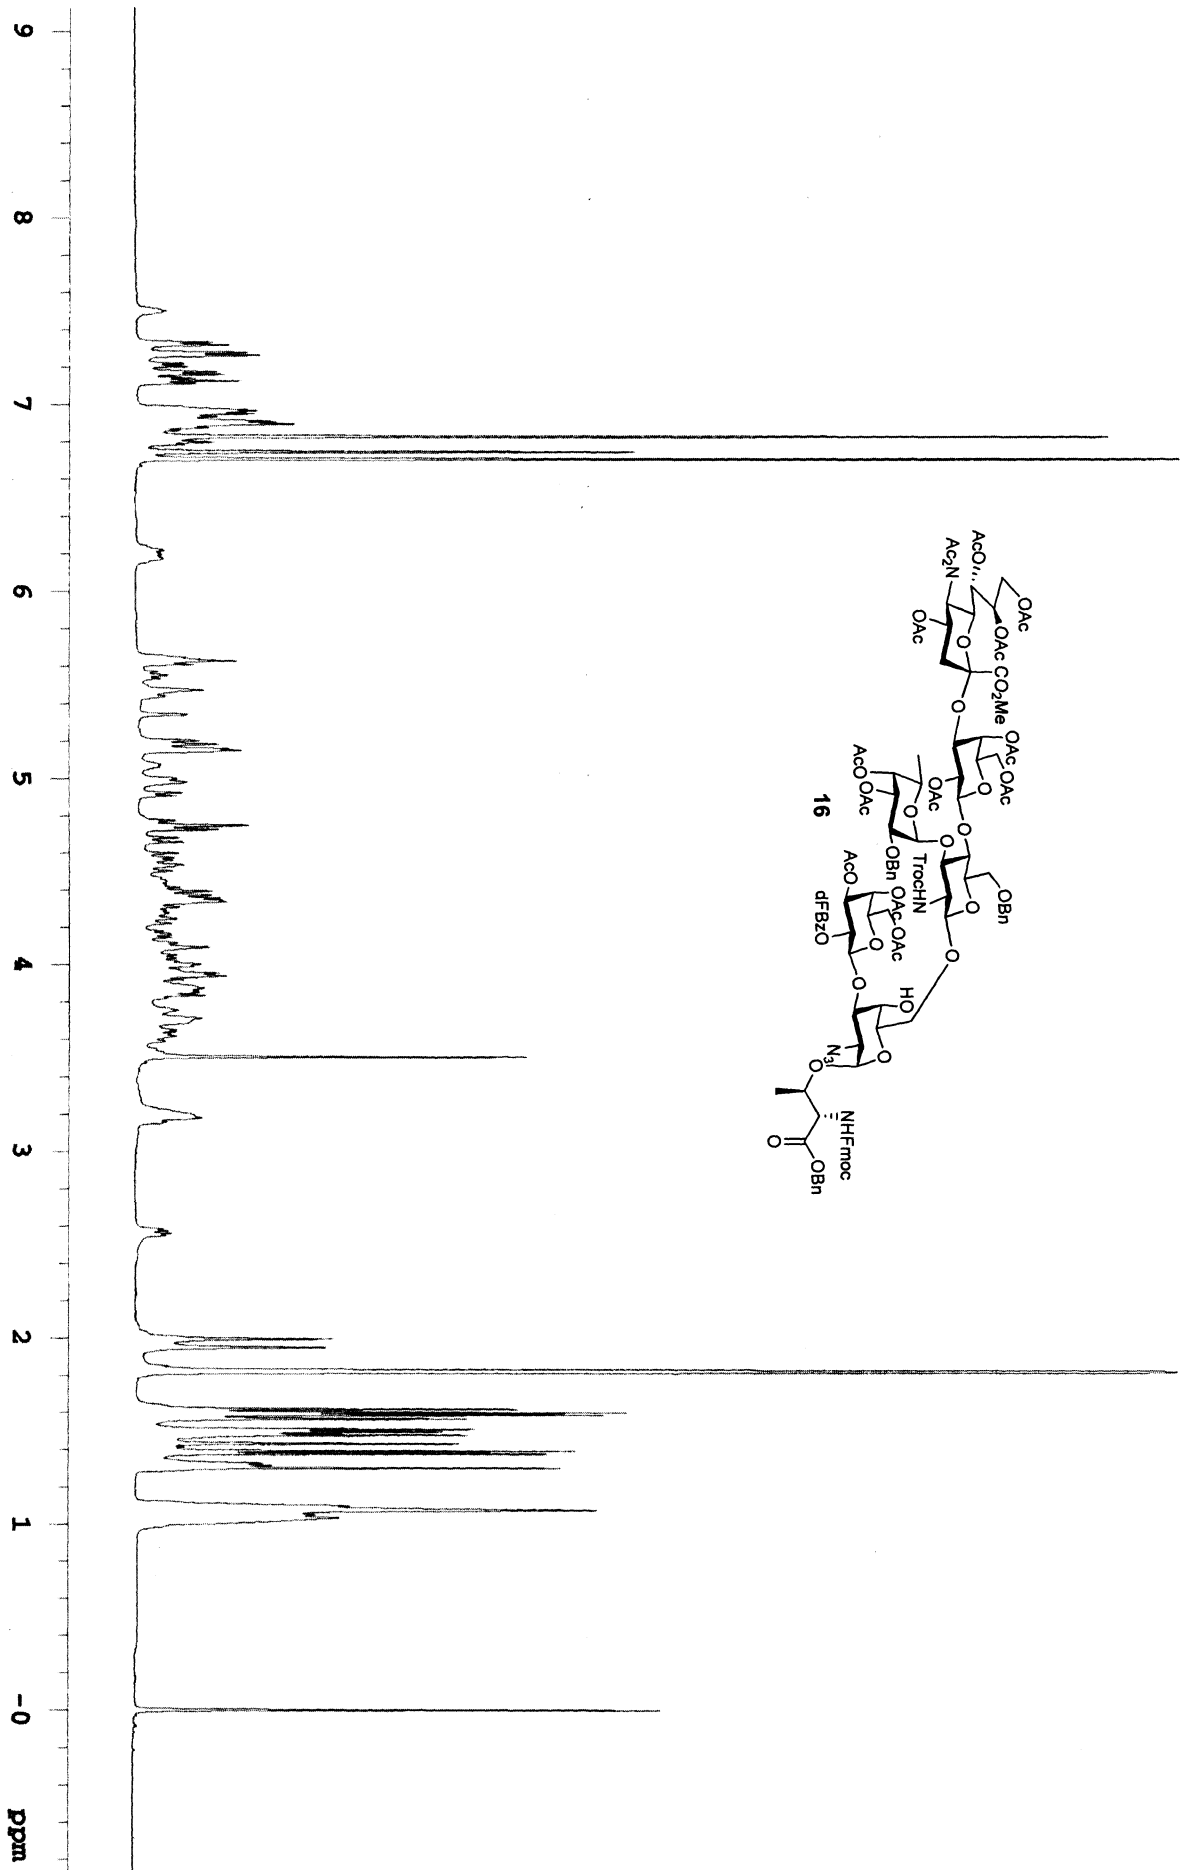

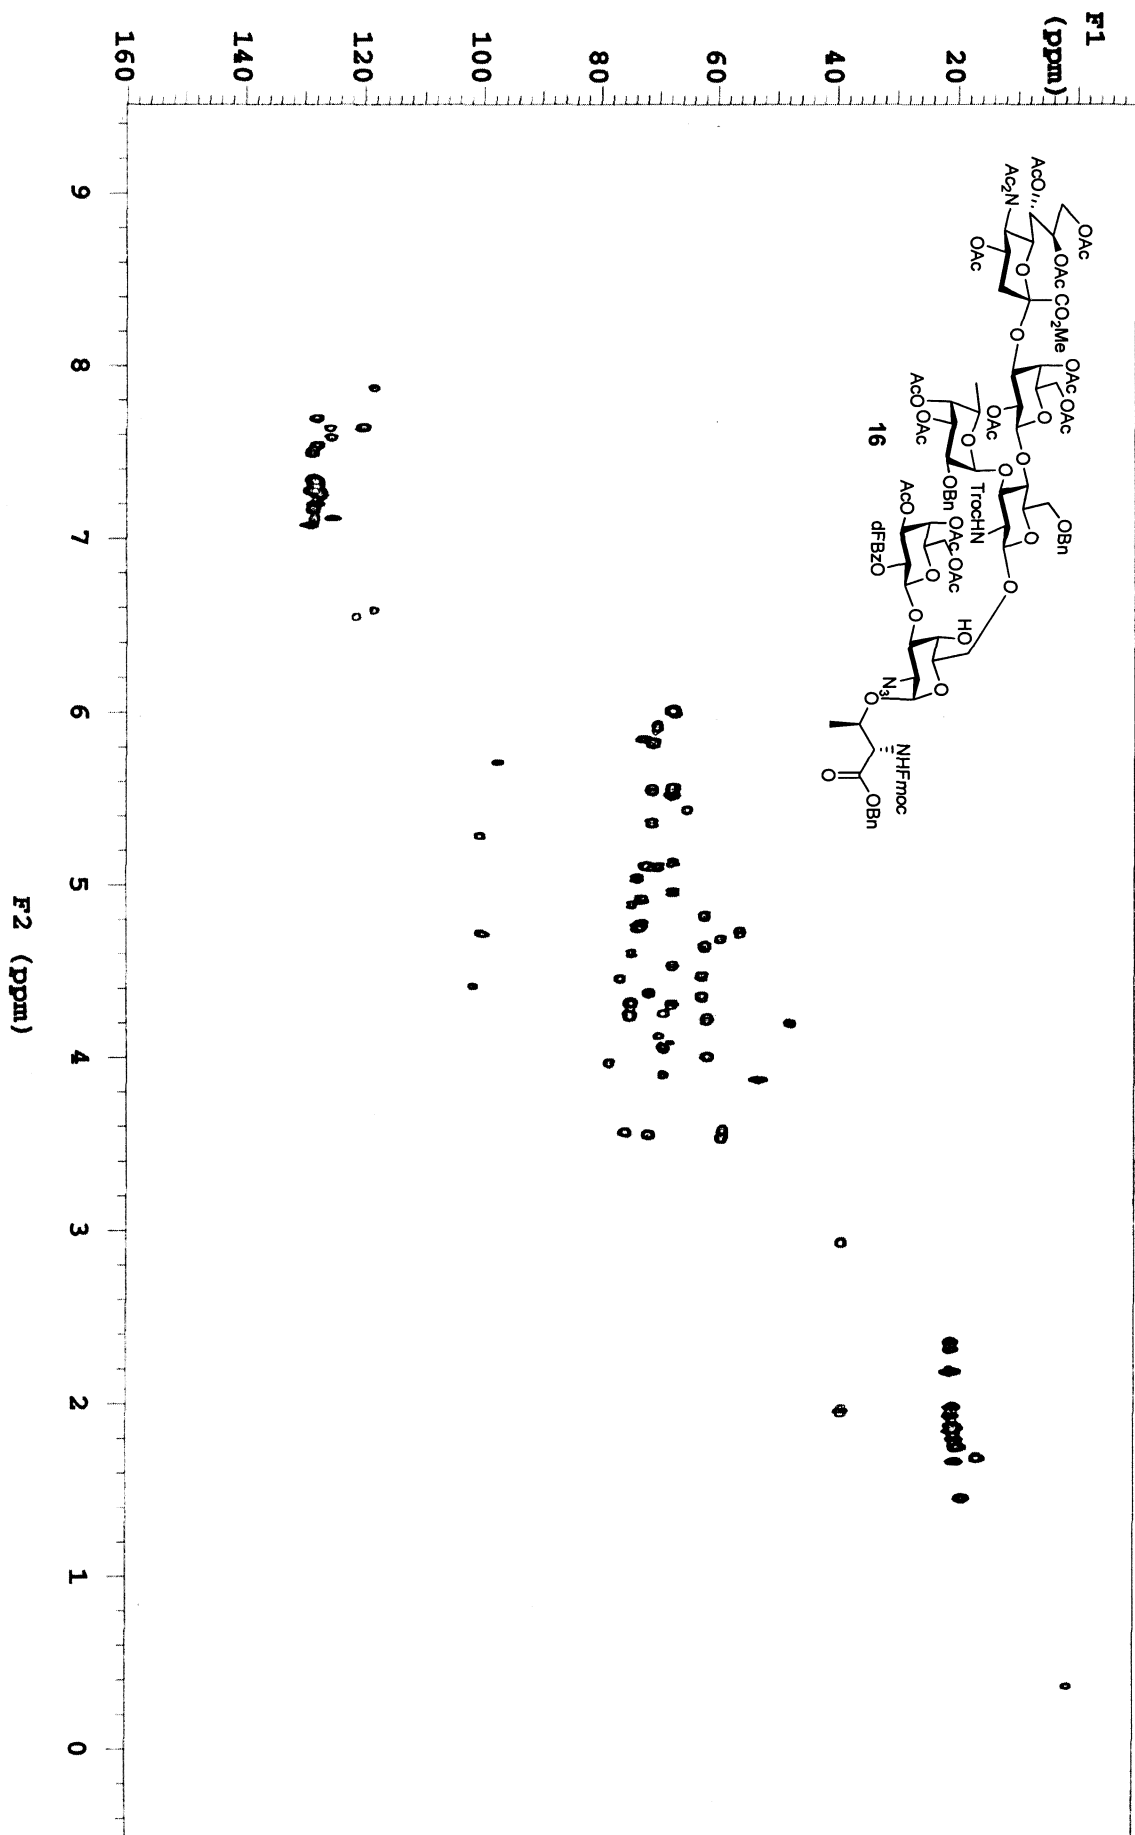

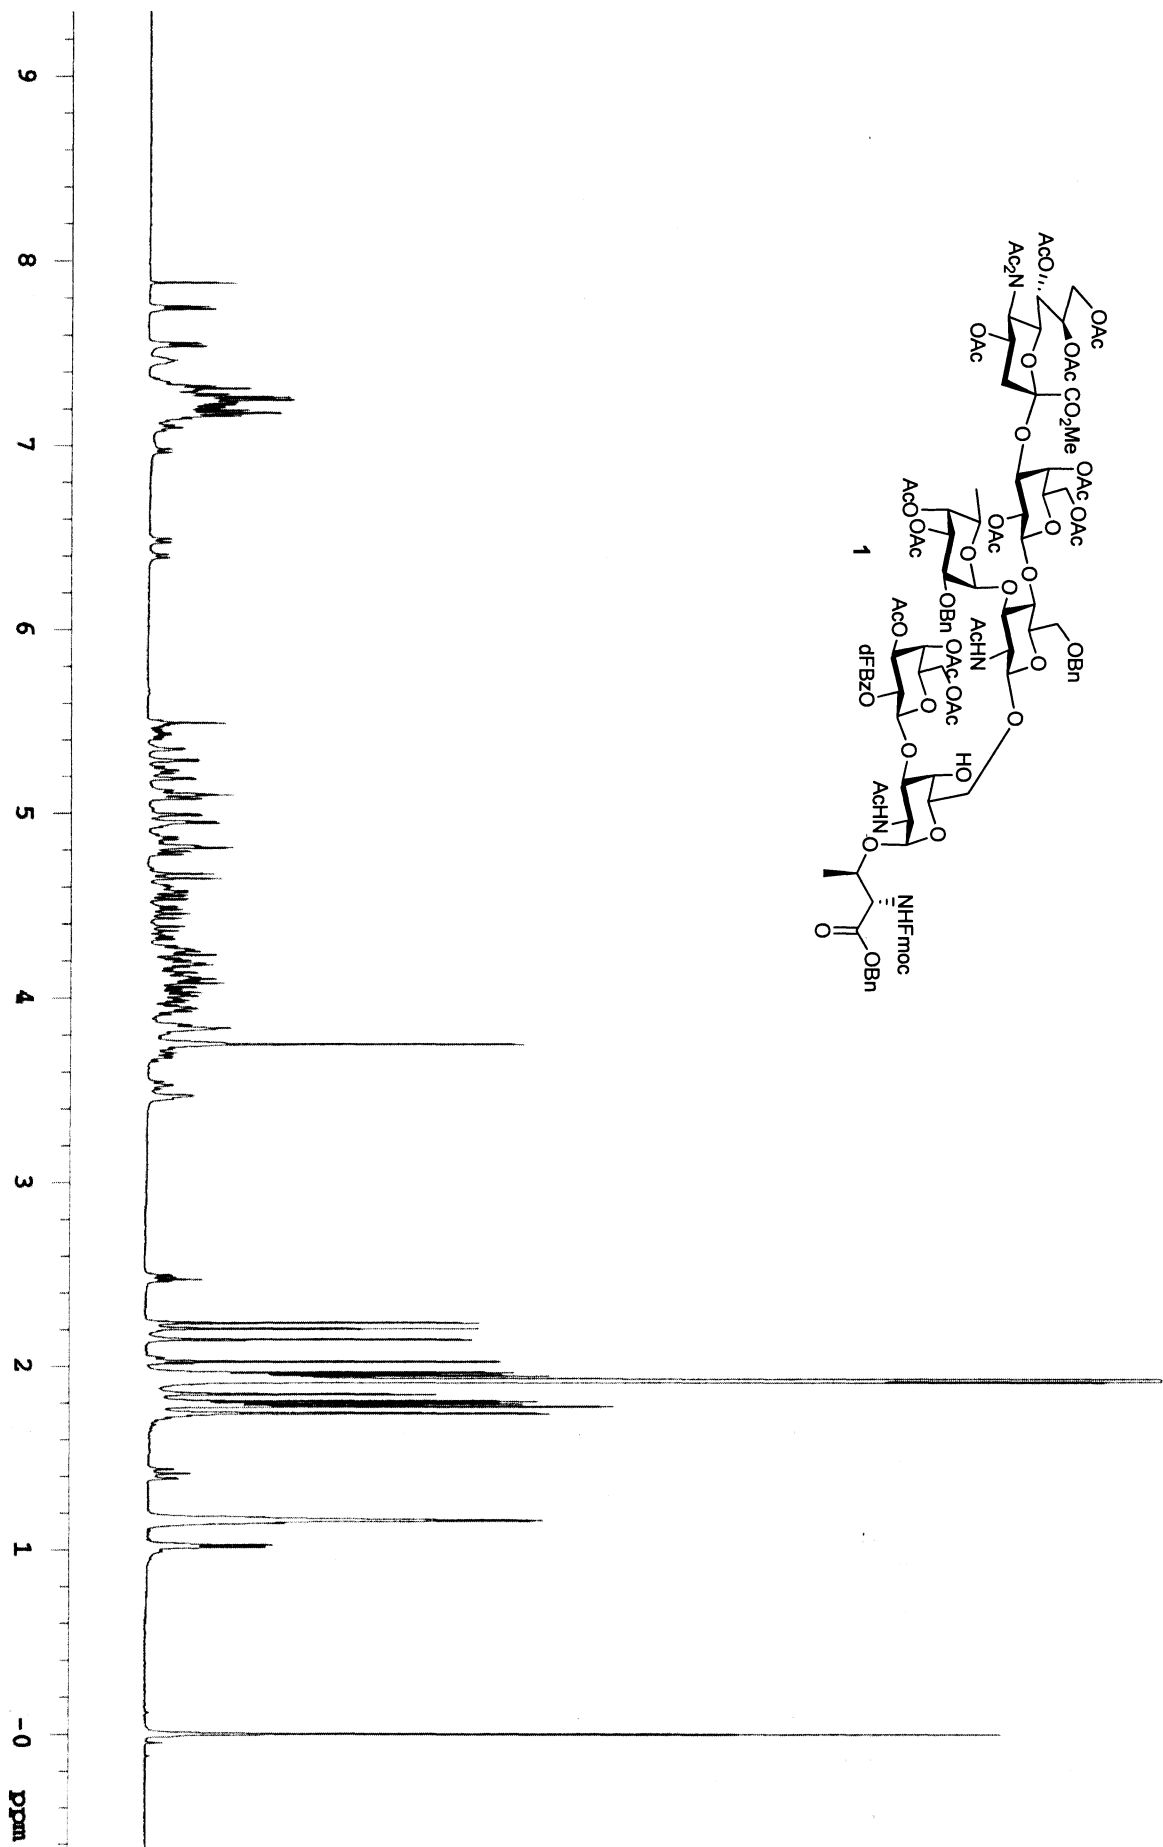

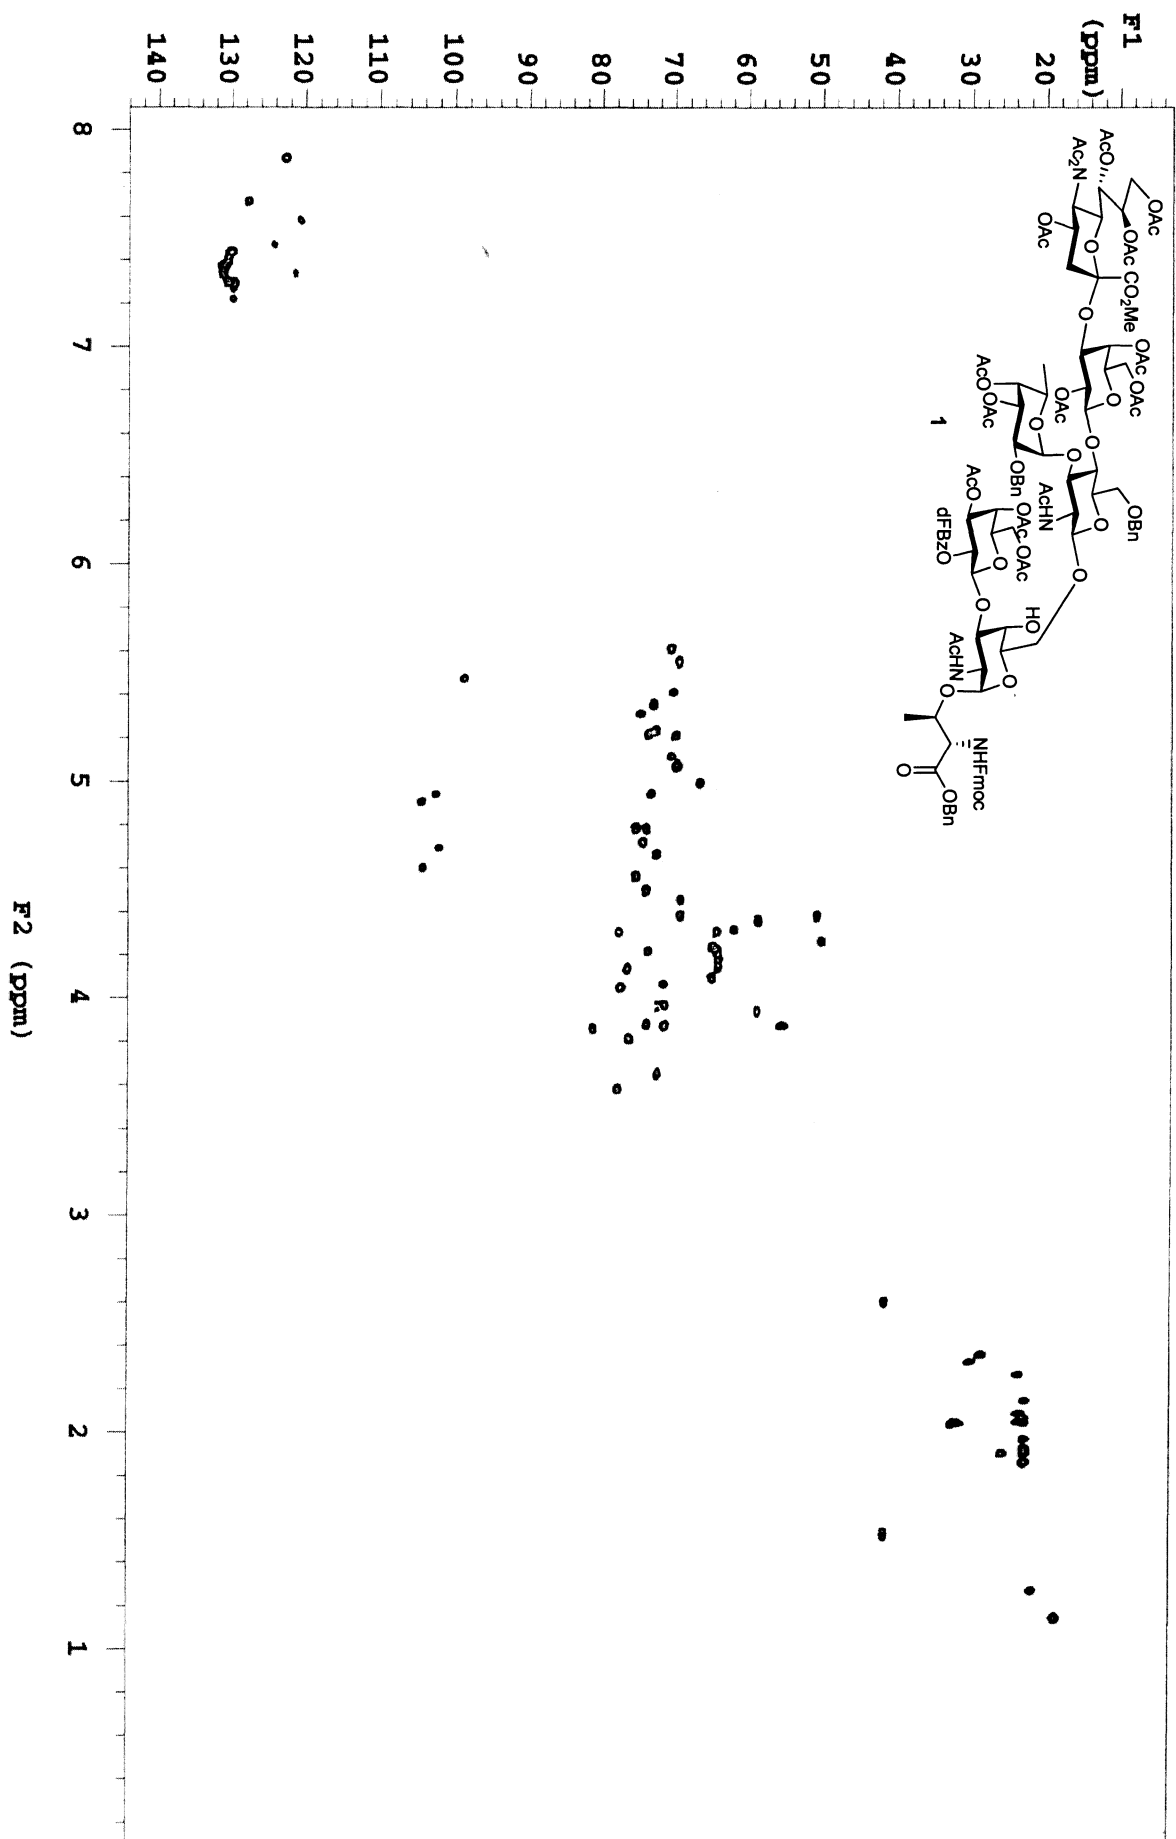

Supplement: NIHMS170870-supplement-Supp_Info.pdf [file NIHMS170870-supplement-Supp_Info.pdf]
